# Supplementary material for: Network Analysis of a Pkd1-Mouse Model of Autosomal Dominant Polycystic Kidney Disease Identifies HNF4α as a Disease Modifier
Source: PLoS Genet. 2012 Nov 29;8(11):e1003053. doi: 10.1371/journal.pgen.1003053 (PMC3510057; doi:10.1371/journal.pgen.1003053)
Supplement: Table S8 — GEO datasets used for meta-analysis. (XLS) [file pgen.1003053.s009.xls]

## Sheet: Menezes_Table S6.xls
Table S8. GEO datasets used for meta-analysis.
Original	GSM	Sample	Chip
GSM120369.CEL.pimg	GSM120369	MammarySidePop- SP3 5-24-04 hnl_JR_865_MA2_3855.txt	Mouse430_2
GSM120370.CEL.pimg	GSM120370	MammarySidePop- NSP3 5-24-06 hnl_JR_865_MA2_3856.txt	Mouse430_2
GSM120371.CEL.pimg	GSM120371	MammarySidePop- SP4 6-14-04 hnl_JR_865_MA2_4113.txt	Mouse430_2
GSM120372.CEL.pimg	GSM120372	MammarySidePop- NSP4 6-14-04 hnl_JR_865_MA2_4114.txt	Mouse430_2
GSM120373.CEL.pimg	GSM120373	MammarySidePop- Strategene Ref 2 hnl_JR_865_MA2_4355.txt	Mouse430_2
GSM120374.CEL.pimg	GSM120374	MammarySidePop- SP2 5-17-04 hnl_JR_865_MA2_3764.txt	Mouse430_2
GSM120375.CEL.pimg	GSM120375	MammarySidePop- NSP2 5-17-04 hnl_JR_865_MA2_3765.txt	Mouse430_2
GSM144585.CEL.pimg	GSM144585	2_RV_6_6_05	Mouse430_2
GSM144586.CEL.pimg	GSM144586	3_RV_6_6_05	Mouse430_2
GSM144587.CEL.pimg	GSM144587	WT_RV_5_11	Mouse430_2
GSM144588.CEL.pimg	GSM144588	WT_RV_2_7_12_05	Mouse430_2
GSM144589.CEL.pimg	GSM144589	WT_RV_3_7_12_05	Mouse430_2
GSM144590.CEL.pimg	GSM144590	Glom_1_11_21_05	Mouse430_2
GSM144591.CEL.pimg	GSM144591	Glom_3_4_11_06	Mouse430_2
GSM144592.CEL.pimg	GSM144592	Glom_2_9_30_05	Mouse430_2
GSM144593.CEL.pimg	GSM144593	Glom_4_10_06	Mouse430_2
GSM144594.CEL.pimg	GSM144594	Proxtubules_1_2_8_05	Mouse430_2
GSM144595.CEL.pimg	GSM144595	Proxtubules_1_11_8_05	Mouse430_2
GSM144596.CEL.pimg	GSM144596	MedUB_1_9_30_05	Mouse430_2
GSM144597.CEL.pimg	GSM144597	MedUB_2_11_8_05	Mouse430_2
GSM144598.CEL.pimg	GSM144598	MedUB_4_11_21_05	Mouse430_2
GSM144599.CEL.pimg	GSM144599	OuterUB_1_1_6_06	Mouse430_2
GSM144600.CEL.pimg	GSM144600	OuterUB_3_11_21_05	Mouse430_2
GSM144601.CEL.pimg	GSM144601	OuterUB_4_11_8_05	Mouse430_2
GSM144602.CEL.pimg	GSM144602	Sshaped_1_10_06_05	Mouse430_2
GSM144603.CEL.pimg	GSM144603	Sshaped_1_11_8_05	Mouse430_2
GSM144604.CEL.pimg	GSM144604	Sshaped_2_10_6_05	Mouse430_2
GSM144605.CEL.pimg	GSM144605	Sshaped_3_10_6_05	Mouse430_2
GSM144606.CEL.pimg	GSM144606	Loosestroma_3_11_8_05	Mouse430_2
GSM144607.CEL.pimg	GSM144607	Loosestroma_4_4_11_8_06	Mouse430_2
GSM144608.CEL.pimg	GSM144608	Loosestroma_5_4_11_06	Mouse430_2
GSM144609.CEL.pimg	GSM144609	Steve_2_1_6_06	Mouse430_2
GSM144610.CEL.pimg	GSM144610	E115closemesLCM5B	Mouse430_2
GSM144611.CEL.pimg	GSM144611	E115MM2B	Mouse430_2
GSM144612.CEL.pimg	GSM144612	E115MMLCM4B	Mouse430_2
GSM144613.CEL.pimg	GSM144613	LCM1151BMM10_7_04	Mouse430_2
GSM144614.CEL.pimg	GSM144614	larrydissectedmesenchymesample2	Mouse430_2
GSM144615.CEL.pimg	GSM144615	4_2_8_05MMcollagenase	Mouse430_2
GSM144616.CEL.pimg	GSM144616	larrydissectmes5	Mouse430_2
GSM144617.CEL.pimg	GSM144617	MetmescollagenaseE115Larry	Mouse430_2
GSM144618.CEL.pimg	GSM144618	larrydissectedbudsample1	Mouse430_2
GSM144619.CEL.pimg	GSM144619	larrydissectedbudsample4	Mouse430_2
GSM144620.CEL.pimg	GSM144620	5_2_8_05UBcollagenase	Mouse430_2
GSM144621.CEL.pimg	GSM144621	larrydissectedbudsample3	Mouse430_2
GSM149579.cel.pimg	GSM149579	Long-term hematopoietic stem cells LT-HSC_SPKSL_1	Mouse430_2
GSM149580.cel.pimg	GSM149580	Long-term hematopoietic stem cells LT-HSC_SPKSL_2	Mouse430_2
GSM149581.cel.pimg	GSM149581	NK cells NK_1	Mouse430_2
GSM149582.cel.pimg	GSM149582	NK cells NK_2	Mouse430_2
GSM149583.cel.pimg	GSM149583	CD4+ naive T-cells t4n_1	Mouse430_2
GSM149584.cel.pimg	GSM149584	CD4+ naive T-cells t4n_2	Mouse430_2
GSM149585.cel.pimg	GSM149585	CD48+ naive T-cells t8n_1	Mouse430_2
GSM149586.cel.pimg	GSM149586	CD8+ naive T-cells t8n_2	Mouse430_2
GSM149587.cel.pimg	GSM149587	CD4+ activated T-cells t4a_1	Mouse430_2
GSM149588.cel.pimg	GSM149588	CD4+ activated T-cells t4a_2	Mouse430_2
GSM149589.cel.pimg	GSM149589	CD8+ activated T-cells t8a_1	Mouse430_2
GSM149590.cel.pimg	GSM149590	CD8+ activated T-cells t8a_2	Mouse430_2
GSM149591.cel.pimg	GSM149591	B-Cell 1	Mouse430_2
GSM149592.cel.pimg	GSM149592	B-Cell 2	Mouse430_2
GSM149593.cel.pimg	GSM149593	Monocyte 1	Mouse430_2
GSM149594.cel.pimg	GSM149594	Monocyte 2	Mouse430_2
GSM149595.cel.pimg	GSM149595	Granulocytes 1	Mouse430_2
GSM149596.cel.pimg	GSM149596	Granulocytes 2	Mouse430_2
GSM149597.cel.pimg	GSM149597	Nucleated Erythrocytes 1	Mouse430_2
GSM149598.cel.pimg	GSM149598	Nucleated Erythrocytes 2	Mouse430_2
GSM152245.CEL.pimg	GSM152245	CCD_1_7_07_06	Mouse430_2
GSM152246.CEL.pimg	GSM152246	Cortical Collecting Duct	Mouse430_2
GSM152247.CEL.pimg	GSM152247	Proxtubules _1_7_07_06	Mouse430_2
GSM152248.CEL.pimg	GSM152248	Proxtubules 2_6_13_06	Mouse430_2
GSM152249.CEL.pimg	GSM152249	Proxtubules_1_6_13_06	Mouse430_2
GSM152250.CEL.pimg	GSM152250	UreteralSmoothmuscle_2_4_11_06	Mouse430_2
GSM152251.CEL.pimg	GSM152251	UreteralSmoothmuscle_2_7_07_06	Mouse430_2
GSM152252.CEL.pimg	GSM152252	UreteralSmoothmuscle3_1_6_06	Mouse430_2
GSM152253.CEL.pimg	GSM152253	Urothelium_1_4_11_06	Mouse430_2
GSM152254.CEL.pimg	GSM152254	Urothelium5_1_6_06	Mouse430_2
GSM152255.CEL.pimg	GSM152255	Urothelium6_1_6_06	Mouse430_2
GSM185954.CEL.pimg	GSM185954	pcdh12-deficient mice rep1	Mouse430_2
GSM185955.CEL.pimg	GSM185955	pcdh12-deficient mice rep2	Mouse430_2
GSM185956.CEL.pimg	GSM185956	pcdh12-deficient mice rep3	Mouse430_2
GSM185957.CEL.pimg	GSM185957	pcdh12-deficient mice rep4	Mouse430_2
GSM185958.CEL.pimg	GSM185958	pcdh12-deficient mice rep5	Mouse430_2
GSM185959.CEL.pimg	GSM185959	Wild-type mice rep1	Mouse430_2
GSM185960.CEL.pimg	GSM185960	Wild-type mice rep2	Mouse430_2
GSM185961.CEL.pimg	GSM185961	Wild-type mice rep3	Mouse430_2
GSM185962.CEL.pimg	GSM185962	Wild-type mice rep4	Mouse430_2
GSM185963.CEL.pimg	GSM185963	Wild-type mice rep5	Mouse430_2
GSM189045.CEL.pimg	GSM189045	Kidney_saline iv_mouse #001	Mouse430_2
GSM189047.CEL.pimg	GSM189047	Kidney_saline iv_mouse #002	Mouse430_2
GSM189048.CEL.pimg	GSM189048	Kidney_saline iv_mouse #003	Mouse430_2
GSM189049.CEL.pimg	GSM189049	Kidney_saline iv_mouse #004	Mouse430_2
GSM189050.CEL.pimg	GSM189050	Kidney_saline iv_mouse #005	Mouse430_2
GSM189051.CEL.pimg	GSM189051	Kidney_saline iv_mouse #006	Mouse430_2
GSM189052.CEL.pimg	GSM189052	Kidney_50 mg/kg VCM iv_mouse #007	Mouse430_2
GSM189053.CEL.pimg	GSM189053	Kidney_50 mg/kg VCM iv_mouse #0078	Mouse430_2
GSM189054.CEL.pimg	GSM189054	Kidney_50 mg/kg VCM iv_mouse #009	Mouse430_2
GSM189055.CEL.pimg	GSM189055	Kidney_50 mg/kg VCM iv_mouse #010	Mouse430_2
GSM189056.CEL.pimg	GSM189056	Kidney_50 mg/kg VCM iv_mouse #011	Mouse430_2
GSM189057.CEL.pimg	GSM189057	Kidney_50 mg/kg VCM iv_mouse #012	Mouse430_2
GSM189058.CEL.pimg	GSM189058	Kidney_200 mg/kg VCM iv_mouse #025	Mouse430_2
GSM189059.CEL.pimg	GSM189059	Kidney_200 mg/kg VCM iv_mouse #026	Mouse430_2
GSM189060.CEL.pimg	GSM189060	Kidney_200 mg/kg VCM iv_mouse #027	Mouse430_2
GSM189062.CEL.pimg	GSM189062	Kidney_200 mg/kg VCM iv_mouse #028	Mouse430_2
GSM189063.CEL.pimg	GSM189063	Kidney_200 mg/kg VCM iv_mouse #029	Mouse430_2
GSM189064.CEL.pimg	GSM189064	Kidney_200 mg/kg VCM iv_mouse #030	Mouse430_2
GSM189065.CEL.pimg	GSM189065	Kidney_400 mg/kg VCM iv_mouse #043	Mouse430_2
GSM189066.CEL.pimg	GSM189066	Kidney_400 mg/kg VCM iv_mouse #044	Mouse430_2
GSM189068.CEL.pimg	GSM189068	Kidney_400 mg/kg VCM iv_mouse #045	Mouse430_2
GSM189069.CEL.pimg	GSM189069	Kidney_400 mg/kg VCM iv_mouse #046	Mouse430_2
GSM189070.CEL.pimg	GSM189070	Kidney_400 mg/kg VCM iv_mouse #047	Mouse430_2
GSM189071.CEL.pimg	GSM189071	Kidney_400 mg/kg VCM iv_mouse #048	Mouse430_2
GSM189072.CEL.pimg	GSM189072	Kidney_saline ip_mouse #061	Mouse430_2
GSM189073.CEL.pimg	GSM189073	Kidney_saline ip_mouse #062	Mouse430_2
GSM189074.CEL.pimg	GSM189074	Kidney_saline ip_mouse #063	Mouse430_2
GSM189075.CEL.pimg	GSM189075	Kidney_saline ip_mouse #064	Mouse430_2
GSM189076.CEL.pimg	GSM189076	Kidney_saline ip_mouse #065	Mouse430_2
GSM189077.CEL.pimg	GSM189077	Kidney_saline ip_mouse #066	Mouse430_2
GSM189078.CEL.pimg	GSM189078	Kidney_50 mg/kg VCM ip_mouse #067	Mouse430_2
GSM189079.CEL.pimg	GSM189079	Kidney_50 mg/kg VCM ip_mouse #068	Mouse430_2
GSM189080.CEL.pimg	GSM189080	Kidney_50 mg/kg VCM ip_mouse #069	Mouse430_2
GSM189081.CEL.pimg	GSM189081	Kidney_50 mg/kg VCM ip_mouse #070	Mouse430_2
GSM189082.CEL.pimg	GSM189082	Kidney_50 mg/kg VCM ip_mouse #071	Mouse430_2
GSM189083.CEL.pimg	GSM189083	Kidney_50 mg/kg VCM ip_mouse #072	Mouse430_2
GSM189084.CEL.pimg	GSM189084	Kidney_200 mg/kg VCM ip_mouse #085	Mouse430_2
GSM189085.CEL.pimg	GSM189085	Kidney_200 mg/kg VCM ip_mouse #086	Mouse430_2
GSM189086.CEL.pimg	GSM189086	Kidney_200 mg/kg VCM ip_mouse #087	Mouse430_2
GSM189087.CEL.pimg	GSM189087	Kidney_200 mg/kg VCM ip_mouse #088	Mouse430_2
GSM189088.CEL.pimg	GSM189088	Kidney_200 mg/kg VCM ip_mouse #089	Mouse430_2
GSM189089.CEL.pimg	GSM189089	Kidney_200 mg/kg VCM ip_mouse #090	Mouse430_2
GSM189090.CEL.pimg	GSM189090	Kidney_400 mg/kg VCM ip_mouse #103	Mouse430_2
GSM189091.CEL.pimg	GSM189091	Kidney_400 mg/kg VCM ip_mouse #104	Mouse430_2
GSM189092.CEL.pimg	GSM189092	Kidney_400 mg/kg VCM ip_mouse #105	Mouse430_2
GSM189093.CEL.pimg	GSM189093	Kidney_400 mg/kg VCM ip_mouse #106	Mouse430_2
GSM189094.CEL.pimg	GSM189094	Kidney_400 mg/kg VCM ip_mouse #107	Mouse430_2
GSM189095.CEL.pimg	GSM189095	Kidney_400 mg/kg VCM ip_mouse #108	Mouse430_2
GSM234772.CEL.pimg	GSM234772	Mouse_WT_ES_clone 1	Mouse430_2
GSM234773.CEL.pimg	GSM234773	Mouse_WT_ES_clone 2	Mouse430_2
GSM234774.CEL.pimg	GSM234774	Mouse_Klf5 KO_ES_clone 1	Mouse430_2
GSM234775.CEL.pimg	GSM234775	Mouse_Klf5 KO_ES_clone 2	Mouse430_2
GSM24056.CEL.pimg	GSM24056	mouse reference OneRA 10 ug -1	Mouse430_2
GSM24057.CEL.pimg	GSM24057	mouse reference OneRA 10 ug -2	Mouse430_2
GSM24058.CEL.pimg	GSM24058	mouse reference OneRA 10 ug -3	Mouse430_2
GSM24060.CEL.pimg	GSM24060	mouse reference TwoRA 10 ng -2	Mouse430_2
GSM24061.CEL.pimg	GSM24061	mouse reference TwoRA 10 ng -3	Mouse430_2
GSM24062.CEL.pimg	GSM24062	mouse reference RS 10 ng -1	Mouse430_2
GSM24063.CEL.pimg	GSM24063	mouse reference RS 10 ng -2	Mouse430_2
GSM24064.CEL.pimg	GSM24064	mouse reference RS 10 ng -3	Mouse430_2
GSM24065.CEL.pimg	GSM24065	mouse Kidney OneRA 10 ug -1	Mouse430_2
GSM24066.CEL.pimg	GSM24066	mouse Kidney OneRA 10 ug -2	Mouse430_2
GSM24067.CEL.pimg	GSM24067	mouse Kidney OneRA 10 ug -3	Mouse430_2
GSM24068.CEL.pimg	GSM24068	mouse Kidney TwoRA 10 ng -1	Mouse430_2
GSM24069.CEL.pimg	GSM24069	mouse Kidney TwoRA 10 ng -2	Mouse430_2
GSM24070.CEL.pimg	GSM24070	mouse Kidney TwoRA 10 ng -3	Mouse430_2
GSM24071.CEL.pimg	GSM24071	mouse Kidney RS 100 ng -1	Mouse430_2
GSM24072.CEL.pimg	GSM24072	mouse Kidney RS 100 ng -2	Mouse430_2
GSM24073.CEL.pimg	GSM24073	mouse Kidney RS 100 ng -3	Mouse430_2
GSM24074.CEL.pimg	GSM24074	mouse Kidney RS 30 ng -1	Mouse430_2
GSM24075.CEL.pimg	GSM24075	mouse Kidney RS 30 ng -2	Mouse430_2
GSM24076.CEL.pimg	GSM24076	mouse Kidney RS 30 ng -3	Mouse430_2
GSM24077.CEL.pimg	GSM24077	mouse Kidney RS 10 ng -1	Mouse430_2
GSM24078.CEL.pimg	GSM24078	mouse Kidney RS 10 ng -2	Mouse430_2
GSM24079.CEL.pimg	GSM24079	mouse Kidney RS 10 ng -3	Mouse430_2
GSM24082.CEL.pimg	GSM24082	mouse Kidney RS 3 ng -1	Mouse430_2
GSM24083.CEL.pimg	GSM24083	mouse Kidney RS 3 ng -2	Mouse430_2
GSM24086.CEL.pimg	GSM24086	mouse Kidney RS 3 ng -3	Mouse430_2
GSM24093.CEL.pimg	GSM24093	mouse reference TwoRA 10 ng -1	Mouse430_2
GSM243346.CEL.pimg	GSM243346	normal mouse kidney E12.5, biological rep 1	Mouse430_2
GSM243347.CEL.pimg	GSM243347	normal mouse kidney E12.5, biological rep 2	Mouse430_2
GSM243348.CEL.pimg	GSM243348	normal mouse kidney E12.5, biological rep 3	Mouse430_2
GSM243349.CEL.pimg	GSM243349	beta-catenin conditional knockout mouse kidney E12.5, biological rep 1	Mouse430_2
GSM243350.CEL.pimg	GSM243350	beta-catenin conditional knockout mouse kidney E12.5, biological rep 2	Mouse430_2
GSM243351.CEL.pimg	GSM243351	beta-catenin conditional knockout mouse kidney E12.5, biological rep 3	Mouse430_2
GSM252064.CEL.pimg	GSM252064	Mouse diaphragm, biological replicate 1	Mouse430_2
GSM252065.CEL.pimg	GSM252065	Mouse diaphragm, biological replicate 2	Mouse430_2
GSM252066.CEL.pimg	GSM252066	Mouse diaphragm, biological replicate 3	Mouse430_2
GSM252067.CEL.pimg	GSM252067	Mouse spleen, biological replicate 1	Mouse430_2
GSM252068.CEL.pimg	GSM252068	Mouse spleen, biological replicate 2	Mouse430_2
GSM252069.CEL.pimg	GSM252069	Mouse spleen, biological replicate 3	Mouse430_2
GSM252070.CEL.pimg	GSM252070	Mouse muscle, biological replicate 1	Mouse430_2
GSM252071.CEL.pimg	GSM252071	Mouse muscle, biological replicate 2	Mouse430_2
GSM252072.CEL.pimg	GSM252072	Mouse muscle, biological replicate 3	Mouse430_2
GSM252073.CEL.pimg	GSM252073	Mouse muscle, biological replicate 4	Mouse430_2
GSM252074.CEL.pimg	GSM252074	Mouse liver, biological replicate 1	Mouse430_2
GSM252075.CEL.pimg	GSM252075	Mouse liver, biological replicate 2	Mouse430_2
GSM252076.CEL.pimg	GSM252076	Mouse liver, biological replicate 3	Mouse430_2
GSM252077.CEL.pimg	GSM252077	Mouse brain, biological replicate 1	Mouse430_2
GSM252078.CEL.pimg	GSM252078	Mouse brain, biological replicate 2	Mouse430_2
GSM252079.CEL.pimg	GSM252079	Mouse brain, biological replicate 3	Mouse430_2
GSM252080.CEL.pimg	GSM252080	Mouse lung, biological replicate 1	Mouse430_2
GSM252081.CEL.pimg	GSM252081	Mouse lung, biological replicate 2	Mouse430_2
GSM252082.CEL.pimg	GSM252082	Mouse lung, biological replicate 3	Mouse430_2
GSM252083.CEL.pimg	GSM252083	Mouse kidney, biological replicate 1	Mouse430_2
GSM252084.CEL.pimg	GSM252084	Mouse kidney, biological replicate 2	Mouse430_2
GSM252085.CEL.pimg	GSM252085	Mouse kidney, biological replicate 3	Mouse430_2
GSM252086.CEL.pimg	GSM252086	Mouse adrenal gland, biological replicate 1	Mouse430_2
GSM252087.CEL.pimg	GSM252087	Mouse adrenal gland, biological replicate 2	Mouse430_2
GSM252088.CEL.pimg	GSM252088	Mouse adrenal gland, biological replicate 3	Mouse430_2
GSM252089.CEL.pimg	GSM252089	Mouse bone marrow, biological replicate 1	Mouse430_2
GSM252090.CEL.pimg	GSM252090	Mouse bone marrow, biological replicate 2	Mouse430_2
GSM252091.CEL.pimg	GSM252091	Mouse bone marrow, biological replicate 3	Mouse430_2
GSM252092.CEL.pimg	GSM252092	Mouse bone marrow, biological replicate 4	Mouse430_2
GSM252093.CEL.pimg	GSM252093	Mouse adipose tissue, biological replicate 1	Mouse430_2
GSM252094.CEL.pimg	GSM252094	Mouse adipose tissue, biological replicate 2	Mouse430_2
GSM252095.CEL.pimg	GSM252095	Mouse adipose tissue, biological replicate 3	Mouse430_2
GSM252096.CEL.pimg	GSM252096	Mouse pituitary gland, biological replicate 1	Mouse430_2
GSM252097.CEL.pimg	GSM252097	Mouse pituitary gland, biological replicate 2	Mouse430_2
GSM252098.CEL.pimg	GSM252098	Mouse pituitary gland, biological replicate 3	Mouse430_2
GSM252099.CEL.pimg	GSM252099	Mouse pituitary gland, biological replicate 4	Mouse430_2
GSM252100.CEL.pimg	GSM252100	Mouse pituitary gland, biological replicate 5	Mouse430_2
GSM252101.CEL.pimg	GSM252101	Mouse salivary gland, biological replicate 1	Mouse430_2
GSM252102.CEL.pimg	GSM252102	Mouse salivary gland, biological replicate 2	Mouse430_2
GSM252103.CEL.pimg	GSM252103	Mouse salivary gland, biological replicate 3	Mouse430_2
GSM252104.CEL.pimg	GSM252104	Mouse seminal vesicle, biological replicate 1	Mouse430_2
GSM252105.CEL.pimg	GSM252105	Mouse seminal vesicle, biological replicate 2	Mouse430_2
GSM252106.CEL.pimg	GSM252106	Mouse seminal vesicle, biological replicate 3	Mouse430_2
GSM252107.CEL.pimg	GSM252107	Mouse thymus, biological replicate 1	Mouse430_2
GSM252108.CEL.pimg	GSM252108	Mouse thymus, biological replicate 2	Mouse430_2
GSM252109.CEL.pimg	GSM252109	Mouse thymus, biological replicate 3	Mouse430_2
GSM252110.CEL.pimg	GSM252110	Mouse testis, biological replicate 1	Mouse430_2
GSM252111.CEL.pimg	GSM252111	Mouse testis, biological replicate 2	Mouse430_2
GSM252112.CEL.pimg	GSM252112	Mouse testis, biological replicate 3	Mouse430_2
GSM252113.CEL.pimg	GSM252113	Mouse heart, biological replicate 1	Mouse430_2
GSM252114.CEL.pimg	GSM252114	Mouse heart, biological replicate 2	Mouse430_2
GSM252115.CEL.pimg	GSM252115	Mouse heart, biological replicate 3	Mouse430_2
GSM252116.CEL.pimg	GSM252116	Mouse small intestine, biological replicate 1	Mouse430_2
GSM252117.CEL.pimg	GSM252117	Mouse small intestine, biological replicate 2	Mouse430_2
GSM252118.CEL.pimg	GSM252118	Mouse small intestine, biological replicate 3	Mouse430_2
GSM252119.CEL.pimg	GSM252119	Mouse eye, biological replicate 1	Mouse430_2
GSM252120.CEL.pimg	GSM252120	Mouse eye, biological replicate 2	Mouse430_2
GSM252121.CEL.pimg	GSM252121	Mouse eye, biological replicate 3	Mouse430_2
GSM252122.CEL.pimg	GSM252122	Mouse ES cells, biological replicate 1	Mouse430_2
GSM252123.CEL.pimg	GSM252123	Mouse ES cells, biological replicate 2	Mouse430_2
GSM252124.CEL.pimg	GSM252124	Mouse ES cells, biological replicate 3	Mouse430_2
GSM252125.CEL.pimg	GSM252125	Mouse placenta, biological replicate 1	Mouse430_2
GSM252126.CEL.pimg	GSM252126	Mouse placenta, biological replicate 2	Mouse430_2
GSM252127.CEL.pimg	GSM252127	Mouse placenta, biological replicate 3	Mouse430_2
GSM252128.CEL.pimg	GSM252128	Mouse ovary, biological replicate 1	Mouse430_2
GSM252129.CEL.pimg	GSM252129	Mouse ovary, biological replicate 2	Mouse430_2
GSM252130.CEL.pimg	GSM252130	Mouse ovary, biological replicate 3	Mouse430_2
GSM252131.CEL.pimg	GSM252131	Mouse fetus, biological replicate 1	Mouse430_2
GSM252132.CEL.pimg	GSM252132	Mouse fetus, biological replicate 2	Mouse430_2
GSM252133.CEL.pimg	GSM252133	Mouse fetus, biological replicate 3	Mouse430_2
GSM256956.CEL.pimg	GSM256956	CLC5 ko rep 1	Mouse430_2
GSM256957.CEL.pimg	GSM256957	CLC5 ko rep 2	Mouse430_2
GSM256958.CEL.pimg	GSM256958	CLC5 ko rep 3	Mouse430_2
GSM256959.CEL.pimg	GSM256959	Wild type rep 1	Mouse430_2
GSM256960.CEL.pimg	GSM256960	Wild type rep 2	Mouse430_2
GSM256961.CEL.pimg	GSM256961	Wild type rep 3	Mouse430_2
GSM257875.CEL.pimg	GSM257875	EMX2-Mouse E10.5 urogenital epithelium +/+ #1	Mouse430_2
GSM257932.CEL.pimg	GSM257932	EMX2-Mouse E10.5 urogenital epithelium +/+ #2	Mouse430_2
GSM257933.CEL.pimg	GSM257933	EMX2-Mouse E10.5 urogenital epithelium +/+ #3	Mouse430_2
GSM257934.CEL.pimg	GSM257934	EMX2-Mouse E10.5 urogenital epithelium -/- #1	Mouse430_2
GSM257935.CEL.pimg	GSM257935	EMX2-Mouse E10.5 urogenital epithelium -/- #2	Mouse430_2
GSM257936.CEL.pimg	GSM257936	EMX2-Mouse E10.5 urogenital epithelium -/- #3	Mouse430_2
GSM258609.CEL.pimg	GSM258609	3T3-L1_4MJW06120821	Mouse430_2
GSM258610.CEL.pimg	GSM258610	3T3-L1_4MJW06120822	Mouse430_2
GSM258611.CEL.pimg	GSM258611	adipose_brown_4MJW06120815	Mouse430_2
GSM258612.CEL.pimg	GSM258612	adipose_brown_4MJW06120816	Mouse430_2
GSM258613.CEL.pimg	GSM258613	adipose_white_4MJW06120803	Mouse430_2
GSM258614.CEL.pimg	GSM258614	adipose_white_4MJW06120804	Mouse430_2
GSM258615.CEL.pimg	GSM258615	adrenal_gland_4MJW061208117	Mouse430_2
GSM258616.CEL.pimg	GSM258616	adrenal_gland_4MJW061208118	Mouse430_2
GSM258617.CEL.pimg	GSM258617	amygdala_4MJW061208119	Mouse430_2
GSM258618.CEL.pimg	GSM258618	amygdala_4MJW061208120	Mouse430_2
GSM258619.CEL.pimg	GSM258619	Baf3_4MJW06120823	Mouse430_2
GSM258620.CEL.pimg	GSM258620	Baf3_4MJW06120824	Mouse430_2
GSM258621.CEL.pimg	GSM258621	B-cells_marginal_zone_4MJW06120889	Mouse430_2
GSM258622.CEL.pimg	GSM258622	B-cells_marginal_zone_4MJW06120890	Mouse430_2
GSM258623.CEL.pimg	GSM258623	bladder_4MJW061208121	Mouse430_2
GSM258624.CEL.pimg	GSM258624	bladder_4MJW061208122	Mouse430_2
GSM258625.CEL.pimg	GSM258625	bone_4MJW06120811	Mouse430_2
GSM258626.CEL.pimg	GSM258626	bone_4MJW06120812	Mouse430_2
GSM258627.CEL.pimg	GSM258627	bone_marrow_4MJW06120841	Mouse430_2
GSM258628.CEL.pimg	GSM258628	bone_marrow_4MJW06120842	Mouse430_2
GSM258629.CEL.pimg	GSM258629	C2C12_4MJW06120825	Mouse430_2
GSM258630.CEL.pimg	GSM258630	C2C12_4MJW06120826	Mouse430_2
GSM258631.CEL.pimg	GSM258631	C3H_10T1_2_4MJW06120827	Mouse430_2
GSM258632.CEL.pimg	GSM258632	C3H_10T1_2_4MJW06120828	Mouse430_2
GSM258633.CEL.pimg	GSM258633	cerebellum_4MJW061208123	Mouse430_2
GSM258634.CEL.pimg	GSM258634	cerebellum_4MJW061208124	Mouse430_2
GSM258635.CEL.pimg	GSM258635	cerebral_cortex_4MJW061208125	Mouse430_2
GSM258636.CEL.pimg	GSM258636	cerebral_cortex_4MJW061208126	Mouse430_2
GSM258637.CEL.pimg	GSM258637	cerebral_cortex_prefrontal_4MJW061208177	Mouse430_2
GSM258638.CEL.pimg	GSM258638	cerebral_cortex_prefrontal_4MJW061208178	Mouse430_2
GSM258639.CEL.pimg	GSM258639	ciliary_bodies_4MJW06120897	Mouse430_2
GSM258640.CEL.pimg	GSM258640	ciliary_bodies_4MJW06120898	Mouse430_2
GSM258641.CEL.pimg	GSM258641	common_myeloid_progenitor_4MJW06120873	Mouse430_2
GSM258642.CEL.pimg	GSM258642	common_myeloid_progenitor_4MJW06120874	Mouse430_2
GSM258643.CEL.pimg	GSM258643	cornea_4MJW061208100	Mouse430_2
GSM258644.CEL.pimg	GSM258644	cornea_4MJW06120899	Mouse430_2
GSM258645.CEL.pimg	GSM258645	dendritic_cells_lymphoid_CD8a+_4MJW061208107	Mouse430_2
GSM258646.CEL.pimg	GSM258646	dendritic_cells_lymphoid_CD8a+_4MJW061208108	Mouse430_2
GSM258647.CEL.pimg	GSM258647	dendritic_cells_myeloid_CD8a-_4MJW061208111	Mouse430_2
GSM258648.CEL.pimg	GSM258648	dendritic_cells_myeloid_CD8a-_4MJW061208112	Mouse430_2
GSM258649.CEL.pimg	GSM258649	dendritic_plasmacytoid_B220+_4MJW061208109	Mouse430_2
GSM258650.CEL.pimg	GSM258650	dendritic_plasmacytoid_B220+_4MJW061208110	Mouse430_2
GSM258651.CEL.pimg	GSM258651	dorsal_root_ganglia_4MJW061208127	Mouse430_2
GSM258652.CEL.pimg	GSM258652	dorsal_root_ganglia_4MJW061208128	Mouse430_2
GSM258653.CEL.pimg	GSM258653	dorsal_striatum_4MJW061208129	Mouse430_2
GSM258654.CEL.pimg	GSM258654	dorsal_striatum_4MJW061208130	Mouse430_2
GSM258655.CEL.pimg	GSM258655	embryonic_stem_line_Bruce4_p13_4MJW06120817	Mouse430_2
GSM258656.CEL.pimg	GSM258656	embryonic_stem_line_Bruce4_p13_4MJW06120818	Mouse430_2
GSM258657.CEL.pimg	GSM258657	embryonic_stem_line_V26_2_p16_4MJW06120819	Mouse430_2
GSM258658.CEL.pimg	GSM258658	embryonic_stem_line_V26_2_p16_4MJW06120820	Mouse430_2
GSM258659.CEL.pimg	GSM258659	epidermis_4MJW06120809	Mouse430_2
GSM258660.CEL.pimg	GSM258660	epidermis_4MJW06120810	Mouse430_2
GSM258661.CEL.pimg	GSM258661	eyecup_4MJW061208103	Mouse430_2
GSM258662.CEL.pimg	GSM258662	eyecup_4MJW061208104	Mouse430_2
GSM258663.CEL.pimg	GSM258663	follicular_B-cells_4MJW06120849	Mouse430_2
GSM258664.CEL.pimg	GSM258664	follicular_B-cells_4MJW06120850	Mouse430_2
GSM258665.CEL.pimg	GSM258665	granulo_mono_progenitor_4MJW06120875	Mouse430_2
GSM258666.CEL.pimg	GSM258666	granulo_mono_progenitor_4MJW06120876	Mouse430_2
GSM258667.CEL.pimg	GSM258667	granulocytes_mac1+gr1+_4MJW06120869	Mouse430_2
GSM258668.CEL.pimg	GSM258668	granulocytes_mac1+gr1+_4MJW06120870	Mouse430_2
GSM258669.CEL.pimg	GSM258669	heart_4MJW061208131	Mouse430_2
GSM258670.CEL.pimg	GSM258670	heart_4MJW061208132	Mouse430_2
GSM258671.CEL.pimg	GSM258671	hippocampus_4MJW06120801	Mouse430_2
GSM258672.CEL.pimg	GSM258672	hippocampus_4MJW06120802	Mouse430_2
GSM258673.CEL.pimg	GSM258673	hypothalamus_4MJW061208133	Mouse430_2
GSM258674.CEL.pimg	GSM258674	hypothalamus_4MJW061208134	Mouse430_2
GSM258675.CEL.pimg	GSM258675	intestine_large_4MJW061208137	Mouse430_2
GSM258676.CEL.pimg	GSM258676	intestine_large_4MJW061208138	Mouse430_2
GSM258677.CEL.pimg	GSM258677	intestine_small_4MJW061208157	Mouse430_2
GSM258678.CEL.pimg	GSM258678	intestine_small_4MJW061208158	Mouse430_2
GSM258679.CEL.pimg	GSM258679	iris_4MJW061208105	Mouse430_2
GSM258680.CEL.pimg	GSM258680	iris_4MJW061208106	Mouse430_2
GSM258681.CEL.pimg	GSM258681	kidney_4MJW061208135	Mouse430_2
GSM258682.CEL.pimg	GSM258682	kidney_4MJW061208136	Mouse430_2
GSM258683.CEL.pimg	GSM258683	lacrimal_gland_4MJW061208179	Mouse430_2
GSM258684.CEL.pimg	GSM258684	lacrimal_gland_4MJW061208180	Mouse430_2
GSM258685.CEL.pimg	GSM258685	lens_4MJW061208101	Mouse430_2
GSM258686.CEL.pimg	GSM258686	lens_4MJW061208102	Mouse430_2
GSM258687.CEL.pimg	GSM258687	liver_4MJW061208139	Mouse430_2
GSM258688.CEL.pimg	GSM258688	liver_4MJW061208140	Mouse430_2
GSM258689.CEL.pimg	GSM258689	lung_4MJW061208141	Mouse430_2
GSM258690.CEL.pimg	GSM258690	lung_4MJW061208142	Mouse430_2
GSM258691.CEL.pimg	GSM258691	lymph_nodes_4MJW06120839	Mouse430_2
GSM258692.CEL.pimg	GSM258692	lymph_nodes_4MJW06120840	Mouse430_2
GSM258693.CEL.pimg	GSM258693	macrophage_bone_marrow_0hr_4MJW06120853	Mouse430_2
GSM258694.CEL.pimg	GSM258694	macrophage_bone_marrow_0hr_4MJW06120854	Mouse430_2
GSM258695.CEL.pimg	GSM258695	macrophage_bone_marrow_24h_LPS_4MJW06120859	Mouse430_2
GSM258696.CEL.pimg	GSM258696	macrophage_bone_marrow_24h_LPS_4MJW06120860	Mouse430_2
GSM258697.CEL.pimg	GSM258697	macrophage_bone_marrow_2hr_LPS_4MJW06120855	Mouse430_2
GSM258698.CEL.pimg	GSM258698	macrophage_bone_marrow_2hr_LPS_4MJW06120856	Mouse430_2
GSM258699.CEL.pimg	GSM258699	macrophage_bone_marrow_6hr_LPS_4MJW06120857	Mouse430_2
GSM258700.CEL.pimg	GSM258700	macrophage_bone_marrow_6hr_LPS_4MJW06120858	Mouse430_2
GSM258701.CEL.pimg	GSM258701	macrophage_peri_LPS_thio_0hrs_4MJW06120843	Mouse430_2
GSM258702.CEL.pimg	GSM258702	macrophage_peri_LPS_thio_0hrs_4MJW06120844	Mouse430_2
GSM258703.CEL.pimg	GSM258703	macrophage_peri_LPS_thio_1hrs_4MJW06120845	Mouse430_2
GSM258704.CEL.pimg	GSM258704	macrophage_peri_LPS_thio_1hrs_4MJW06120846	Mouse430_2
GSM258705.CEL.pimg	GSM258705	macrophage_peri_LPS_thio_7hrs_4MJW06120847	Mouse430_2
GSM258706.CEL.pimg	GSM258706	macrophage_peri_LPS_thio_7hrs_4MJW06120848	Mouse430_2
GSM258707.CEL.pimg	GSM258707	mammary_gland__lact_4MJW061208187	Mouse430_2
GSM258708.CEL.pimg	GSM258708	mammary_gland__lact_4MJW061208188	Mouse430_2
GSM258709.CEL.pimg	GSM258709	mammary_gland_non-lactating_4MJW061208143	Mouse430_2
GSM258710.CEL.pimg	GSM258710	mammary_gland_non-lactating_4MJW061208144	Mouse430_2
GSM258711.CEL.pimg	GSM258711	mast_cells_4MJW06120851	Mouse430_2
GSM258712.CEL.pimg	GSM258712	mast_cells_4MJW06120852	Mouse430_2
GSM258713.CEL.pimg	GSM258713	mast_cells_IgE_4MJW06120883	Mouse430_2
GSM258714.CEL.pimg	GSM258714	mast_cells_IgE_4MJW06120884	Mouse430_2
GSM258715.CEL.pimg	GSM258715	mast_cells_IgE+antigen_1hr_4MJW06120885	Mouse430_2
GSM258716.CEL.pimg	GSM258716	mast_cells_IgE+antigen_1hr_4MJW06120886	Mouse430_2
GSM258717.CEL.pimg	GSM258717	mast_cells_IgE+antigen_6hr_4MJW06120887	Mouse430_2
GSM258718.CEL.pimg	GSM258718	mast_cells_IgE+antigen_6hr_4MJW06120888	Mouse430_2
GSM258719.CEL.pimg	GSM258719	mega_erythrocyte_progenitor_4MJW06120879	Mouse430_2
GSM258720.CEL.pimg	GSM258720	mega_erythrocyte_progenitor_4MJW06120880	Mouse430_2
GSM258721.CEL.pimg	GSM258721	microglia_4MJW061208183	Mouse430_2
GSM258722.CEL.pimg	GSM258722	microglia_4MJW061208184	Mouse430_2
GSM258723.CEL.pimg	GSM258723	mIMCD-3_4MJW06120831	Mouse430_2
GSM258724.CEL.pimg	GSM258724	mIMCD-3_4MJW06120832	Mouse430_2
GSM258725.CEL.pimg	GSM258725	min6_4MJW06120829	Mouse430_2
GSM258726.CEL.pimg	GSM258726	min6_4MJW06120830	Mouse430_2
GSM258727.CEL.pimg	GSM258727	neuro2a_4MJW06120833	Mouse430_2
GSM258728.CEL.pimg	GSM258728	neuro2a_4MJW06120834	Mouse430_2
GSM258729.CEL.pimg	GSM258729	nih_3T3_4MJW06120835	Mouse430_2
GSM258730.CEL.pimg	GSM258730	nih_3T3_4MJW06120836	Mouse430_2
GSM258731.CEL.pimg	GSM258731	NK_cells_4MJW06120881	Mouse430_2
GSM258732.CEL.pimg	GSM258732	NK_cells_4MJW06120882	Mouse430_2
GSM258733.CEL.pimg	GSM258733	nucleus_accumbens_4MJW061208145	Mouse430_2
GSM258734.CEL.pimg	GSM258734	nucleus_accumbens_4MJW061208146	Mouse430_2
GSM258735.CEL.pimg	GSM258735	olfactory_bulb_4MJW061208147	Mouse430_2
GSM258736.CEL.pimg	GSM258736	olfactory_bulb_4MJW061208148	Mouse430_2
GSM258737.CEL.pimg	GSM258737	osteoblast_day14_4MJW06120865	Mouse430_2
GSM258738.CEL.pimg	GSM258738	osteoblast_day14_4MJW06120866	Mouse430_2
GSM258739.CEL.pimg	GSM258739	osteoblast_day21_4MJW06120867	Mouse430_2
GSM258740.CEL.pimg	GSM258740	osteoblast_day21_4MJW06120868	Mouse430_2
GSM258741.CEL.pimg	GSM258741	osteoblast_day5_4MJW06120863	Mouse430_2
GSM258742.CEL.pimg	GSM258742	osteoblast_day5_4MJW06120864	Mouse430_2
GSM258743.CEL.pimg	GSM258743	osteoclasts_4MJW06120861	Mouse430_2
GSM258744.CEL.pimg	GSM258744	osteoclasts_4MJW06120862	Mouse430_2
GSM258745.CEL.pimg	GSM258745	ovary_4MJW061208149	Mouse430_2
GSM258746.CEL.pimg	GSM258746	ovary_4MJW061208150	Mouse430_2
GSM258747.CEL.pimg	GSM258747	pancreas_4MJW06120813	Mouse430_2
GSM258748.CEL.pimg	GSM258748	pancreas_4MJW06120814	Mouse430_2
GSM258749.CEL.pimg	GSM258749	pituitary_4MJW061208151	Mouse430_2
GSM258750.CEL.pimg	GSM258750	pituitary_4MJW061208152	Mouse430_2
GSM258751.CEL.pimg	GSM258751	placenta_4MJW061208189	Mouse430_2
GSM258752.CEL.pimg	GSM258752	placenta_4MJW061208190	Mouse430_2
GSM258753.CEL.pimg	GSM258753	prostate_4MJW061208153	Mouse430_2
GSM258754.CEL.pimg	GSM258754	prostate_4MJW061208154	Mouse430_2
GSM258755.CEL.pimg	GSM258755	RAW_264_7_4MJW06120837	Mouse430_2
GSM258756.CEL.pimg	GSM258756	RAW_264_7_4MJW06120838	Mouse430_2
GSM258757.CEL.pimg	GSM258757	retina_4MJW06120895	Mouse430_2
GSM258758.CEL.pimg	GSM258758	retina_4MJW06120896	Mouse430_2
GSM258759.CEL.pimg	GSM258759	retinal_pigment_epithelium_4MJW06120893	Mouse430_2
GSM258760.CEL.pimg	GSM258760	retinal_pigment_epithelium_4MJW06120894	Mouse430_2
GSM258761.CEL.pimg	GSM258761	salivary_gland_4MJW061208181	Mouse430_2
GSM258762.CEL.pimg	GSM258762	salivary_gland_4MJW061208182	Mouse430_2
GSM258763.CEL.pimg	GSM258763	skeletal_muscle_4MJW061208155	Mouse430_2
GSM258764.CEL.pimg	GSM258764	skeletal_muscle_4MJW061208156	Mouse430_2
GSM258765.CEL.pimg	GSM258765	spinal_cord_4MJW061208159	Mouse430_2
GSM258766.CEL.pimg	GSM258766	spinal_cord_4MJW061208160	Mouse430_2
GSM258767.CEL.pimg	GSM258767	spleen_4MJW061208161	Mouse430_2
GSM258768.CEL.pimg	GSM258768	spleen_4MJW061208162	Mouse430_2
GSM258769.CEL.pimg	GSM258769	stem_cells__HSC_4MJW06120877	Mouse430_2
GSM258770.CEL.pimg	GSM258770	stem_cells__HSC_4MJW06120878	Mouse430_2
GSM258771.CEL.pimg	GSM258771	stomach_4MJW061208163	Mouse430_2
GSM258772.CEL.pimg	GSM258772	stomach_4MJW061208164	Mouse430_2
GSM258773.CEL.pimg	GSM258773	T-cells_CD4+_4MJW061208113	Mouse430_2
GSM258774.CEL.pimg	GSM258774	T-cells_CD4+_4MJW061208114	Mouse430_2
GSM258775.CEL.pimg	GSM258775	T-cells_CD8+_4MJW061208115	Mouse430_2
GSM258776.CEL.pimg	GSM258776	T-cells_CD8+_4MJW061208116	Mouse430_2
GSM258777.CEL.pimg	GSM258777	T-cells_foxP3+_4MJW06120891	Mouse430_2
GSM258778.CEL.pimg	GSM258778	T-cells_foxP3+_4MJW06120892	Mouse430_2
GSM258779.CEL.pimg	GSM258779	testis_4MJW061208165	Mouse430_2
GSM258780.CEL.pimg	GSM258780	testis_4MJW061208166	Mouse430_2
GSM258781.CEL.pimg	GSM258781	thymocyte_DP_CD4+CD8+_4MJW061208171	Mouse430_2
GSM258782.CEL.pimg	GSM258782	thymocyte_DP_CD4+CD8+_4MJW061208172	Mouse430_2
GSM258783.CEL.pimg	GSM258783	thymocyte_SP_CD4+_4MJW061208173	Mouse430_2
GSM258784.CEL.pimg	GSM258784	thymocyte_SP_CD4+_4MJW061208174	Mouse430_2
GSM258785.CEL.pimg	GSM258785	thymocyte_SP_CD8+_4MJW061208175	Mouse430_2
GSM258786.CEL.pimg	GSM258786	thymocyte_SP_CD8+_4MJW061208176	Mouse430_2
GSM258787.CEL.pimg	GSM258787	umbilical_cord_4MJW061208185	Mouse430_2
GSM258788.CEL.pimg	GSM258788	umbilical_cord_4MJW061208186	Mouse430_2
GSM258789.CEL.pimg	GSM258789	uterus_4MJW061208169	Mouse430_2
GSM258790.CEL.pimg	GSM258790	uterus_4MJW061208170	Mouse430_2
GSM266130.CEL.pimg	GSM266130	Fumarate hydratase-wild-type mouse kidney - 1	Mouse430_2
GSM266131.CEL.pimg	GSM266131	Fumarate hydratase-wild-type mouse kidney - 2	Mouse430_2
GSM266132.CEL.pimg	GSM266132	Fumarate hydratase-wild-type mouse kidney - 3	Mouse430_2
GSM266133.CEL.pimg	GSM266133	Fumarate hydratase-knockout mouse kidney - 1	Mouse430_2
GSM266134.CEL.pimg	GSM266134	Fumarate hydratase-knockout mouse kidney - 2	Mouse430_2
GSM266135.CEL.pimg	GSM266135	Fumarate hydratase-knockout mouse kidney - 3	Mouse430_2
GSM267980.CEL.pimg	GSM267980	Kidney_Aqp11+/+_P7_1-1	Mouse430_2
GSM267981.CEL.pimg	GSM267981	Kidney_Aqp11-/-_P7_1-2	Mouse430_2
GSM267982.CEL.pimg	GSM267982	Kidney_Aqp11+/+_P7_2-1	Mouse430_2
GSM267983.CEL.pimg	GSM267983	Kidney_Aqp11+/+_P7_2-2	Mouse430_2
GSM267984.CEL.pimg	GSM267984	Kidney_Aqp11-/-_P7_2-3	Mouse430_2
GSM267985.CEL.pimg	GSM267985	Kidney_Aqp11-/-_P7_2-4	Mouse430_2
GSM267986.CEL.pimg	GSM267986	Kidney_Aqp11+/+_P7_3-1	Mouse430_2
GSM267987.CEL.pimg	GSM267987	Kidney_Aqp11-/-_P7_3-2	Mouse430_2
GSM267988.CEL.pimg	GSM267988	Kidney_Aqp11-/-_P7_3-3	Mouse430_2
GSM267989.CEL.pimg	GSM267989	Kidney_Aqp11-/-_P7_3-4	Mouse430_2
GSM267990.CEL.pimg	GSM267990	Kidney_Aqp11+/+_P7_4-1	Mouse430_2
GSM267991.CEL.pimg	GSM267991	Kidney_Aqp11+/+_P7_4-2	Mouse430_2
GSM267992.CEL.pimg	GSM267992	Kidney_Aqp11-/-_P7_4-3	Mouse430_2
GSM267993.CEL.pimg	GSM267993	Kidney_Aqp11-/-_P7_4-4	Mouse430_2
GSM267994.CEL.pimg	GSM267994	Kidney_Aqp11+/+_P7_5-1	Mouse430_2
GSM267995.CEL.pimg	GSM267995	Kidney_Aqp11-/-_P7_5-2	Mouse430_2
GSM290631.CEL.pimg	GSM290631	E11.5 lung	Mouse430_2
GSM290632.CEL.pimg	GSM290632	E13.5 lung	Mouse430_2
GSM290633.CEL.pimg	GSM290633	E14.5 lung	Mouse430_2
GSM290634.CEL.pimg	GSM290634	E16.5 lung	Mouse430_2
GSM290635.CEL.pimg	GSM290635	P5 lung	Mouse430_2
GSM297808.CEL.pimg	GSM297808	mouse colon_hnf4mutant_rep1	Mouse430_2
GSM297817.CEL.pimg	GSM297817	mouse colon_hnf4control_rep1	Mouse430_2
GSM297818.CEL.pimg	GSM297818	mouse colon_hnf4control_rep2	Mouse430_2
GSM297819.CEL.pimg	GSM297819	mouse colon_hnf4control_rep3	Mouse430_2
GSM297820.CEL.pimg	GSM297820	mouse colon_hnf4mutant_rep2	Mouse430_2
GSM297821.CEL.pimg	GSM297821	mouse colon_hnf4mutant_rep3	Mouse430_2
GSM314049.CEL.pimg	GSM314049	ctrl-low-1	Mouse430_2
GSM314050.CEL.pimg	GSM314050	ctrl-low-2	Mouse430_2
GSM314051.CEL.pimg	GSM314051	tead2VP16-conf-1	Mouse430_2
GSM314052.CEL.pimg	GSM314052	tead2VP16-conf-2	Mouse430_2
GSM314053.CEL.pimg	GSM314053	yap-conf-1	Mouse430_2
GSM314054.CEL.pimg	GSM314054	yap-conf-2	Mouse430_2
GSM314055.CEL.pimg	GSM314055	tead2EnR-low-1	Mouse430_2
GSM314056.CEL.pimg	GSM314056	tead2EnR-low-2	Mouse430_2
GSM314057.CEL.pimg	GSM314057	ctrl-over-1	Mouse430_2
GSM314058.CEL.pimg	GSM314058	ctrl-over-2	Mouse430_2
GSM314059.CEL.pimg	GSM314059	tead2VP16-over-1	Mouse430_2
GSM314060.CEL.pimg	GSM314060	tead2VP16-over-2	Mouse430_2
GSM322703.CEL.pimg	GSM322703	Mammary Gland_WT_rep1	Mouse430_2
GSM322717.CEL.pimg	GSM322717	Mammary Gland_WT_rep3	Mouse430_2
GSM322718.CEL.pimg	GSM322718	Mammary Gland_WT_rep2	Mouse430_2
GSM322719.CEL.pimg	GSM322719	Mammary Gland_Cav-3KO_rep1	Mouse430_2
GSM322721.CEL.pimg	GSM322721	Mammary Gland_Cav-3KO_rep2	Mouse430_2
GSM322722.CEL.pimg	GSM322722	Mammary Gland_Cav-3KO_rep3	Mouse430_2
GSM337760.cel.pimg	GSM337760	Astrocytes, Cerebellum, TRAP RNA 1	Mouse430_2
GSM337761.cel.pimg	GSM337761	Astrocytes, Cerebellum, TRAP RNA 2	Mouse430_2
GSM337762.cel.pimg	GSM337762	Astrocytes, Cerebellum, TRAP RNA 3	Mouse430_2
GSM337763.cel.pimg	GSM337763	Astrocytes, Cortex, TRAP RNA 1	Mouse430_2
GSM337764.cel.pimg	GSM337764	Astrocytes, Cortex, TRAP RNA 2	Mouse430_2
GSM337765.cel.pimg	GSM337765	Astrocytes, Cortex, Unbound RNA 1	Mouse430_2
GSM337766.cel.pimg	GSM337766	Astrocytes, Cortex, TRAP RNA 3	Mouse430_2
GSM337767.cel.pimg	GSM337767	Astrocytes, Cortex, TRAP RNA 4	Mouse430_2
GSM337768.cel.pimg	GSM337768	Astrocytes, Cortex, Unbound RNA 2	Mouse430_2
GSM337769.cel.pimg	GSM337769	Cck+ Neurons, Cortex, TRAP RNA 1	Mouse430_2
GSM337770.cel.pimg	GSM337770	Cck+ Neurons, Cortex, TRAP RNA 2	Mouse430_2
GSM337771.cel.pimg	GSM337771	Cck+ Neurons, Cortex, TRAP RNA 3	Mouse430_2
GSM337772.cel.pimg	GSM337772	Cck+ Neurons, Cortex, Unbound RNA 1	Mouse430_2
GSM337773.cel.pimg	GSM337773	Motor Neurons, Brainstem, TRAP RNA 1	Mouse430_2
GSM337774.cel.pimg	GSM337774	Motor Neurons, Brainstem, TRAP RNA 2	Mouse430_2
GSM337775.cel.pimg	GSM337775	Motor Neurons, Brainstem, TRAP RNA 3	Mouse430_2
GSM337776.cel.pimg	GSM337776	Motor Neurons, Brainstem, Unbound RNA 1	Mouse430_2
GSM337777.cel.pimg	GSM337777	Motor Neurons, Brainstem, Unbound RNA 2	Mouse430_2
GSM337778.cel.pimg	GSM337778	Motor Neurons, Brainstem, Unbound RNA 3	Mouse430_2
GSM337779.cel.pimg	GSM337779	Cholinergic Neurons, Basal Forebrain, TRAP RNA 1	Mouse430_2
GSM337780.cel.pimg	GSM337780	Cholinergic Neurons, Basal Forebrain, TRAP RNA 2	Mouse430_2
GSM337781.cel.pimg	GSM337781	Cholinergic Neurons, Basal Forebrain, TRAP RNA 3	Mouse430_2
GSM337782.cel.pimg	GSM337782	Cholinergic Neurons, Basal Forebrain, Unbound RNA 1	Mouse430_2
GSM337783.cel.pimg	GSM337783	Cholinergic Neurons, Basal Forebrain, Unbound RNA 2	Mouse430_2
GSM337784.cel.pimg	GSM337784	Cholinergic Neurons, Basal Forebrain, Unbound RNA 3	Mouse430_2
GSM337785.cel.pimg	GSM337785	Cholinergic Neurons, Spinal Cord, TRAP RNA 1	Mouse430_2
GSM337786.cel.pimg	GSM337786	Cholinergic Neurons, Spinal Cord, TRAP RNA 2	Mouse430_2
GSM337787.cel.pimg	GSM337787	Cholinergic Neurons, Spinal Cord, TRAP RNA 3	Mouse430_2
GSM337788.cel.pimg	GSM337788	Cholinergic Neurons, Spinal Cord, Unbound RNA 1	Mouse430_2
GSM337789.cel.pimg	GSM337789	Cholinergic Neurons, Spinal Cord, Unbound RNA 2	Mouse430_2
GSM337790.cel.pimg	GSM337790	Cholinergic Neurons, Spinal Cord, Unbound RNA 3	Mouse430_2
GSM337791.cel.pimg	GSM337791	Cholinergic Neurons, Corpus Striatum, TRAP RNA 1	Mouse430_2
GSM337792.cel.pimg	GSM337792	Cholinergic Neurons, Corpus Striatum, TRAP RNA 2	Mouse430_2
GSM337793.cel.pimg	GSM337793	Cholinergic Neurons, Corpus Striatum, TRAP RNA 3	Mouse430_2
GSM337794.cel.pimg	GSM337794	Cholinergic Neurons, Corpus Striatum, Unbound RNA 1	Mouse430_2
GSM337795.cel.pimg	GSM337795	Cholinergic Neurons, Corpus Striatum, Unbound RNA 2	Mouse430_2
GSM337796.cel.pimg	GSM337796	Mature Oligodendrocytes, Cerebellum, TRAP RNA 1	Mouse430_2
GSM337797.cel.pimg	GSM337797	Mature Oligodendrocytes, Cerebellum, TRAP RNA 2	Mouse430_2
GSM337798.cel.pimg	GSM337798	Mature Oligodendrocytes, Cerebellum, TRAP RNA 3	Mouse430_2
GSM337799.cel.pimg	GSM337799	Mature Oligodendrocytes, Cerebellum, Unbound RNA 3	Mouse430_2
GSM337800.cel.pimg	GSM337800	Mature Oligodendrocytes, Cortex, TRAP RNA 1	Mouse430_2
GSM337801.cel.pimg	GSM337801	Mature Oligodendrocytes, Cortex, TRAP RNA 2	Mouse430_2
GSM337802.cel.pimg	GSM337802	Mature Oligodendrocytes, Cortex, TRAP RNA 3	Mouse430_2
GSM337803.cel.pimg	GSM337803	Mature Oligodendrocytes, Cortex, Unbound RNA 1	Mouse430_2
GSM337804.cel.pimg	GSM337804	Cort+ Neurons, Cortex, TRAP RNA 1	Mouse430_2
GSM337805.cel.pimg	GSM337805	Cort+ Neurons, Cortex, TRAP RNA 2	Mouse430_2
GSM337806.cel.pimg	GSM337806	Cort+ Neurons, Cortex, TRAP RNA 3	Mouse430_2
GSM337807.cel.pimg	GSM337807	Drd1+ Medium Spiny Neurons, Striatum, TRAP RNA 1	Mouse430_2
GSM337808.cel.pimg	GSM337808	Drd1+ Medium Spiny Neurons, Striatum, TRAP RNA 2	Mouse430_2
GSM337809.cel.pimg	GSM337809	Drd1+ Medium Spiny Neurons, Striatum, TRAP RNA 3	Mouse430_2
GSM337810.cel.pimg	GSM337810	Drd1+ Medium Spiny Neurons, Striatum, Unbound RNA 1	Mouse430_2
GSM337811.cel.pimg	GSM337811	Drd1+ Medium Spiny Neurons, Striatum, Unbound RNA 2	Mouse430_2
GSM337812.cel.pimg	GSM337812	Drd2+ Medium Spiny Neurons, Striatum, TRAP RNA 1	Mouse430_2
GSM337813.cel.pimg	GSM337813	Drd2+ Medium Spiny Neurons, Striatum, TRAP RNA 2	Mouse430_2
GSM337814.cel.pimg	GSM337814	Drd2+ Medium Spiny Neurons, Striatum, TRAP RNA 3	Mouse430_2
GSM337815.cel.pimg	GSM337815	Drd2+ Medium Spiny Neurons, Striatum, Unbound RNA 1	Mouse430_2
GSM337816.cel.pimg	GSM337816	Drd2+ Medium Spiny Neurons, Striatum, Unbound RNA 2	Mouse430_2
GSM337817.cel.pimg	GSM337817	Layer 5a Neurons, Cortex, TRAP RNA 1	Mouse430_2
GSM337818.cel.pimg	GSM337818	Layer 5a Neurons, Cortex, TRAP RNA 2	Mouse430_2
GSM337819.cel.pimg	GSM337819	Layer 5a Neurons, Cortex, TRAP RNA 3	Mouse430_2
GSM337820.cel.pimg	GSM337820	Layer 5a Neurons, Cortex, Unbound RNA 1	Mouse430_2
GSM337821.cel.pimg	GSM337821	Layer 5b Neurons, Cortex, TRAP RNA 1	Mouse430_2
GSM337822.cel.pimg	GSM337822	Layer 5b Neurons, Cortex, TRAP RNA 2	Mouse430_2
GSM337823.cel.pimg	GSM337823	Layer 5b Neurons, Cortex, TRAP RNA 3	Mouse430_2
GSM337824.cel.pimg	GSM337824	Layer 5b Neurons, Cortex, Unbound RNA 1	Mouse430_2
GSM337825.cel.pimg	GSM337825	Golgi Neurons, Cerebellum, TRAP RNA 1	Mouse430_2
GSM337826.cel.pimg	GSM337826	Golgi Neurons, Cerebellum, TRAP RNA 2	Mouse430_2
GSM337827.cel.pimg	GSM337827	Golgi Neurons, Cerebellum, TRAP RNA 3	Mouse430_2
GSM337828.cel.pimg	GSM337828	Unipolar Brush Neurons, Cerebellum, TRAP RNA 1	Mouse430_2
GSM337829.cel.pimg	GSM337829	Unipolar Brush Neurons, Cerebellum, TRAP RNA 2	Mouse430_2
GSM337830.cel.pimg	GSM337830	Unipolar Brush Neurons, Cerebellum, TRAP RNA 3	Mouse430_2
GSM337831.cel.pimg	GSM337831	Stellate and Basket Neurons, Cerebellum, TRAP RNA 1	Mouse430_2
GSM337832.cel.pimg	GSM337832	Stellate and Basket Neurons, Cerebellum, TRAP RNA 2	Mouse430_2
GSM337833.cel.pimg	GSM337833	Stellate and Basket Neurons, Cerebellum, TRAP RNA 3	Mouse430_2
GSM337834.cel.pimg	GSM337834	Granule Neurons, Cerebellum, TRAP RNA 1	Mouse430_2
GSM337835.cel.pimg	GSM337835	Granule Neurons, Cerebellum, TRAP RNA 2	Mouse430_2
GSM337836.cel.pimg	GSM337836	Granule Neurons, Cerebellum, TRAP RNA 3	Mouse430_2
GSM337837.cel.pimg	GSM337837	Layer 6 Neurons, Cortex, TRAP RNA 1	Mouse430_2
GSM337838.cel.pimg	GSM337838	Layer 6 Neurons, Cortex, TRAP RNA 2	Mouse430_2
GSM337839.cel.pimg	GSM337839	Layer 6 Neurons, Cortex, TRAP RNA 3	Mouse430_2
GSM337840.cel.pimg	GSM337840	Layer 6 Neurons, Cortex, Unbound RNA 1	Mouse430_2
GSM337841.cel.pimg	GSM337841	Mixed Oligodendroglia, Cerebellum, TRAP RNA 1	Mouse430_2
GSM337842.cel.pimg	GSM337842	Mixed Oligodendroglia, Cerebellum, TRAP RNA 2	Mouse430_2
GSM337843.cel.pimg	GSM337843	Mixed Oligodendroglia, Cerebellum, TRAP RNA 3	Mouse430_2
GSM337844.cel.pimg	GSM337844	Mixed Oligodendroglia, Cortex, TRAP RNA 1	Mouse430_2
GSM337845.cel.pimg	GSM337845	Mixed Oligodendroglia, Cortex, TRAP RNA 2	Mouse430_2
GSM337846.cel.pimg	GSM337846	Mixed Oligodendroglia, Cortex, TRAP RNA 3	Mouse430_2
GSM337847.cel.pimg	GSM337847	Mixed Oligodendroglia, Cortex, Unbound RNA 1	Mouse430_2
GSM337848.cel.pimg	GSM337848	Purkinje Neuron, Cerebellum, TRAP RNA 1	Mouse430_2
GSM337849.cel.pimg	GSM337849	Purkinje Neuron, Cerebellum, TRAP RNA 2	Mouse430_2
GSM337850.cel.pimg	GSM337850	Purkinje Neuron, Cerebellum, TRAP RNA 3	Mouse430_2
GSM337851.cel.pimg	GSM337851	Purkinje Neuron, Cerebellum, TRAP RNA 4	Mouse430_2
GSM337852.cel.pimg	GSM337852	Purkinje Neuron, Cerebellum, TRAP RNA 5	Mouse430_2
GSM337853.cel.pimg	GSM337853	Purkinje Neuron, Cerebellum, TRAP RNA 6	Mouse430_2
GSM337854.cel.pimg	GSM337854	Purkinje Neuron, Cerebellum, Unbound RNA 1	Mouse430_2
GSM337855.cel.pimg	GSM337855	Purkinje Neuron, Cerebellum, Unbound RNA 2	Mouse430_2
GSM337856.cel.pimg	GSM337856	Purkinje Neuron, Cerebellum, Unbound RNA 3	Mouse430_2
GSM337857.cel.pimg	GSM337857	Pnoc+ Neurons, Cortex, TRAP RNA 1	Mouse430_2
GSM337858.cel.pimg	GSM337858	Pnoc+ Neurons, Cortex, TRAP RNA 2	Mouse430_2
GSM337859.cel.pimg	GSM337859	Pnoc+ Neurons, Cortex, TRAP RNA 3	Mouse430_2
GSM337860.cel.pimg	GSM337860	Pnoc+ Neurons, Cortex, Unbound RNA 1	Mouse430_2
GSM337861.cel.pimg	GSM337861	Bergmann Glia, Cerebellum, TRAP RNA 1	Mouse430_2
GSM337862.cel.pimg	GSM337862	Bergmann Glia, Cerebellum, TRAP RNA 2	Mouse430_2
GSM337863.cel.pimg	GSM337863	Bergmann Glia, Cerebellum, TRAP RNA 3	Mouse430_2
GSM337864.cel.pimg	GSM337864	Bergmann Glia, Cerebellum, Unbound RNA 1	Mouse430_2
GSM337865.cel.pimg	GSM337865	Bergmann Glia, Cerebellum, Unbound RNA 2	Mouse430_2
GSM337866.cel.pimg	GSM337866	Bergmann Glia, Cerebellum, Unbound RNA 3	Mouse430_2
GSM338336.CEL.pimg	GSM338336	Lens epithelium, SPARC KO, #1L	Mouse430_2
GSM338338.CEL.pimg	GSM338338	Lens epithelium, SPARC KO, #1R	Mouse430_2
GSM338339.CEL.pimg	GSM338339	Lens epithelium, WT, #2L	Mouse430_2
GSM338340.CEL.pimg	GSM338340	Lens epithelium, SPARC KO, #4L	Mouse430_2
GSM338341.CEL.pimg	GSM338341	Lens epithelium, WT, #5L	Mouse430_2
GSM338342.CEL.pimg	GSM338342	Lens epithelium, WT, #6L	Mouse430_2
GSM338343.CEL.pimg	GSM338343	Lens epithelium, SPARC KO, #7L	Mouse430_2
GSM343456.CEL.pimg	GSM343456	mpkCCD_clone_2_dDAVP	Mouse430_2
GSM343457.CEL.pimg	GSM343457	mpkCCD_clone_3_dDAVP	Mouse430_2
GSM343464.CEL.pimg	GSM343464	mpkCCD_clone_9_dDAVP	Mouse430_2
GSM343466.CEL.pimg	GSM343466	mpkCCD_clone_10_dDAVP	Mouse430_2
GSM343467.CEL.pimg	GSM343467	mpkCCD_clone_11_dDAVP	Mouse430_2
GSM343469.CEL.pimg	GSM343469	mpkCCD_original_clone_dDAVP	Mouse430_2
GSM356334.CEL.pimg	GSM356334	TgFVB Kidney 6wk	Mouse430_2
GSM356335.CEL.pimg	GSM356335	TgFVB Kidney 8wk	Mouse430_2
GSM356336.CEL.pimg	GSM356336	FVB Kidney 8wk	Mouse430_2
GSM356337.CEL.pimg	GSM356337	FVB Kidney 6wk	Mouse430_2
GSM37497.CEL.pimg	GSM37497	fasting mouse liver	Mouse430_2
GSM37498.CEL.pimg	GSM37498	refed mouse liver	Mouse430_2
GSM37499.CEL.pimg	GSM37499	primary mouse hepatocyte, forskolin 0hr	Mouse430_2
GSM37500.CEL.pimg	GSM37500	primary mouse hepatocyte, forskolin 1hr	Mouse430_2
GSM37501.CEL.pimg	GSM37501	primary mouse hepatocyte, forskolin 4hr	Mouse430_2
GSM381310.CEL.pimg	GSM381310	ES to ectoderm cells with inducible Notch1; not induced	Mouse430_2
GSM381311.CEL.pimg	GSM381311	ES to ectoderm cells with inducible Notch1; OHT induced	Mouse430_2
GSM381312.CEL.pimg	GSM381312	ES to mesoderm cells with control construct; not induced	Mouse430_2
GSM381313.CEL.pimg	GSM381313	ES to mesoderm cells with control construct; OHT induced	Mouse430_2
GSM381314.CEL.pimg	GSM381314	ES to mesoderm cells with inducible Notch1; not induced	Mouse430_2
GSM381315.CEL.pimg	GSM381315	ES to mesoderm cells with inducible Notch1; OHT induced	Mouse430_2
GSM381316.CEL.pimg	GSM381316	Mesodermal progenitors with control construct; not induced	Mouse430_2
GSM381317.CEL.pimg	GSM381317	Mesodermal progenitors with control construct; OHT induced	Mouse430_2
GSM381318.CEL.pimg	GSM381318	Mesodermal progenitors with inducible Notch1; not induced; replicate 1	Mouse430_2
GSM381319.CEL.pimg	GSM381319	Mesodermal progenitors with inducible Notch1; not induced; replicate 2	Mouse430_2
GSM381320.CEL.pimg	GSM381320	Mesodermal progenitors with inducible Notch1; OHT induced; replicate 1	Mouse430_2
GSM381321.CEL.pimg	GSM381321	Mesodermal progenitors with inducible Notch1; OHT induced; replicate 2	Mouse430_2
GSM381322.CEL.pimg	GSM381322	Mesodermal progenitors with inducible Notch1; not induced; CHX treated; replicate 1	Mouse430_2
GSM381323.CEL.pimg	GSM381323	Mesodermal progenitors with inducible Notch1; not induced; CHX treated; replicate 2	Mouse430_2
GSM381324.CEL.pimg	GSM381324	Mesodermal progenitors with inducible Notch1; OHT induced; CHX treated; replicate 1	Mouse430_2
GSM381325.CEL.pimg	GSM381325	Mesodermal progenitors with inducible Notch1; OHT induced; CHX treated; replicate 2	Mouse430_2
GSM415922.CEL.pimg	GSM415922	KLF5-OE-Control 1	Mouse430_2
GSM415923.CEL.pimg	GSM415923	KLF5-OE-Control 2	Mouse430_2
GSM415924.CEL.pimg	GSM415924	KLF5-OE-Control 3	Mouse430_2
GSM415925.CEL.pimg	GSM415925	KLF5-OE 1	Mouse430_2
GSM415926.CEL.pimg	GSM415926	KLF5-OE 2	Mouse430_2
GSM415927.CEL.pimg	GSM415927	KLF5-OE 3	Mouse430_2
GSM415928.CEL.pimg	GSM415928	KLF5-KO-Control 1	Mouse430_2
GSM415929.CEL.pimg	GSM415929	KLF5-KO-Control 2	Mouse430_2
GSM415930.CEL.pimg	GSM415930	KLF5-KO-Control 3	Mouse430_2
GSM415931.CEL.pimg	GSM415931	KLF5-KO 1	Mouse430_2
GSM415932.CEL.pimg	GSM415932	KLF5-KO 2	Mouse430_2
GSM415933.CEL.pimg	GSM415933	KLF5-KO 3	Mouse430_2
GSM417399.CEL.pimg	GSM417399	WT biological replicate 1	Mouse430_2
GSM417400.CEL.pimg	GSM417400	WT biological replicate 2	Mouse430_2
GSM417401.CEL.pimg	GSM417401	WT biological replicate 3	Mouse430_2
GSM417402.CEL.pimg	GSM417402	ERRa KO biological replicate 1	Mouse430_2
GSM417403.CEL.pimg	GSM417403	ERRa KO biological replicate 2	Mouse430_2
GSM417404.CEL.pimg	GSM417404	ERRa KO biological replicate 3	Mouse430_2
GSM417476.CEL.pimg	GSM417476	MammaryBraching-RON-5KO_1	Mouse430_2
GSM417477.CEL.pimg	GSM417477	MammaryBraching-RON-5KO_2	Mouse430_2
GSM417478.CEL.pimg	GSM417478	MammaryBraching-RON-5KO_3	Mouse430_2
GSM417479.CEL.pimg	GSM417479	MammaryBraching-RON-6KO_1	Mouse430_2
GSM417480.CEL.pimg	GSM417480	MammaryBraching-RON-6KO_2	Mouse430_2
GSM417481.CEL.pimg	GSM417481	MammaryBraching-RON-6KO_3	Mouse430_2
GSM417482.CEL.pimg	GSM417482	MammaryBraching-RON-7KO_1	Mouse430_2
GSM417483.CEL.pimg	GSM417483	MammaryBraching-RON-7KO_2	Mouse430_2
GSM417484.CEL.pimg	GSM417484	MammaryBraching-RON-7KO_3	Mouse430_2
GSM417485.CEL.pimg	GSM417485	MammaryBraching-RON-5WT_1	Mouse430_2
GSM417486.CEL.pimg	GSM417486	MammaryBraching-RON-5WT_2	Mouse430_2
GSM417487.CEL.pimg	GSM417487	MammaryBraching-RON-5WT_3	Mouse430_2
GSM417488.CEL.pimg	GSM417488	MammaryBraching-RON-6WT_1	Mouse430_2
GSM417489.CEL.pimg	GSM417489	MammaryBraching-RON-6WT_2	Mouse430_2
GSM417490.CEL.pimg	GSM417490	MammaryBraching-RON-6WT_3	Mouse430_2
GSM417491.CEL.pimg	GSM417491	MammaryBraching-RON-7WT_1	Mouse430_2
GSM417492.CEL.pimg	GSM417492	MammaryBraching-RON-7WT_2	Mouse430_2
GSM417493.CEL.pimg	GSM417493	MammaryBraching-RON-7WT_3	Mouse430_2
GSM442884.CEL.pimg	GSM442884	DCT/CNT_ZT0_pool1	Mouse430_2
GSM442885.CEL.pimg	GSM442885	DCT/CNT_ZT0_pool2	Mouse430_2
GSM442886.CEL.pimg	GSM442886	DCT/CNT_ZT4_pool1	Mouse430_2
GSM442887.CEL.pimg	GSM442887	DCT/CNT_ZT4_pool2	Mouse430_2
GSM442888.CEL.pimg	GSM442888	DCT/CNT_ZT8_pool1	Mouse430_2
GSM442889.CEL.pimg	GSM442889	DCT/CNT_ZT8_pool2	Mouse430_2
GSM442890.CEL.pimg	GSM442890	DCT/CNT_ZT12_pool1	Mouse430_2
GSM442891.CEL.pimg	GSM442891	DCT/CNT_ZT12_pool2	Mouse430_2
GSM442892.CEL.pimg	GSM442892	DCT/CNT_ZT16_pool1	Mouse430_2
GSM442893.CEL.pimg	GSM442893	DCT/CNT_ZT16_pool2	Mouse430_2
GSM442894.CEL.pimg	GSM442894	DCT/CNT_ZT20_pool1	Mouse430_2
GSM442895.CEL.pimg	GSM442895	DCT/CNT_ZT20_pool2	Mouse430_2
GSM442896.CEL.pimg	GSM442896	CCD_ZT0_pool1	Mouse430_2
GSM442897.CEL.pimg	GSM442897	CCD_ZT0_pool2	Mouse430_2
GSM442898.CEL.pimg	GSM442898	CCD_ZT4_pool1	Mouse430_2
GSM442899.CEL.pimg	GSM442899	CCD_ZT4_pool2	Mouse430_2
GSM442900.CEL.pimg	GSM442900	CCD_ZT8_pool1	Mouse430_2
GSM442901.CEL.pimg	GSM442901	CCD_ZT8_pool2	Mouse430_2
GSM442902.CEL.pimg	GSM442902	CCD_ZT12_pool1	Mouse430_2
GSM442903.CEL.pimg	GSM442903	CCD_ZT12_pool2	Mouse430_2
GSM442904.CEL.pimg	GSM442904	CCD_ZT16_pool1	Mouse430_2
GSM442905.CEL.pimg	GSM442905	CCD_ZT16_pool2	Mouse430_2
GSM442906.CEL.pimg	GSM442906	CCD_ZT20_pool1	Mouse430_2
GSM442907.CEL.pimg	GSM442907	CCD_ZT20_pool2	Mouse430_2
GSM454291_8171_461_WT_Rep1.CEL.pimg	?	?	Mouse430_2
GSM454292_8172_461_WT_Rep2.CEL.pimg	?	?	Mouse430_2
GSM454293_8173_461_WT_Rep3.CEL.pimg	?	?	Mouse430_2
GSM454294_8176_461_KO_Rep2.CEL.pimg	?	?	Mouse430_2
GSM454295_8177_461_KO_Rep3.CEL.pimg	?	?	Mouse430_2
GSM454296_8178_461_KO_Rep4.CEL.pimg	?	?	Mouse430_2
GSM454297_8179_461_KO_Rep5.CEL.pimg	?	?	Mouse430_2
GSM458136.CEL.pimg	GSM458136	WT1mut-contr-1047	Mouse430_2
GSM458140.CEL.pimg	GSM458140	WT1mut-contr-1057	Mouse430_2
GSM458141.CEL.pimg	GSM458141	WT1mut-contr-1064	Mouse430_2
GSM458142.CEL.pimg	GSM458142	WT1mut-contr-1068	Mouse430_2
GSM458143.CEL.pimg	GSM458143	WT1mut-contr-1102	Mouse430_2
GSM458144.CEL.pimg	GSM458144	WT1mut-ki-1058	Mouse430_2
GSM458145.CEL.pimg	GSM458145	WT1mut-ki-1065	Mouse430_2
GSM458146.CEL.pimg	GSM458146	WT1mut-ki-1066	Mouse430_2
GSM458147.CEL.pimg	GSM458147	WT1mut-ki-1067	Mouse430_2
GSM458148.CEL.pimg	GSM458148	WT1mut-ki-1122	Mouse430_2
GSM459337.CEL.pimg	GSM459337	Kidney_KO_ANG II_rep1	Mouse430_2
GSM459338.CEL.pimg	GSM459338	Kidney_KO_ANG II_rep2	Mouse430_2
GSM459339.CEL.pimg	GSM459339	Kidney_KO_ANG II_rep3	Mouse430_2
GSM459340.CEL.pimg	GSM459340	Kidney_WT_ANG II_rep1	Mouse430_2
GSM459341.CEL.pimg	GSM459341	Kidney_WT_ANG II_rep2	Mouse430_2
GSM459342.CEL.pimg	GSM459342	Kidney_WT_ANG II_rep3	Mouse430_2
GSM459343.CEL.pimg	GSM459343	Kidney_KO_baseline_rep1	Mouse430_2
GSM459344.CEL.pimg	GSM459344	Kidney_KO_baseline_rep2	Mouse430_2
GSM459345.CEL.pimg	GSM459345	Kidney_KO_baseline_rep3	Mouse430_2
GSM459346.CEL.pimg	GSM459346	Kidney_WT_baseline_rep1	Mouse430_2
GSM459347.CEL.pimg	GSM459347	Kidney_WT_baseline_rep2	Mouse430_2
GSM459348.CEL.pimg	GSM459348	Kidney_WT_baseline_rep3	Mouse430_2
GSM462796.CEL.pimg	GSM462796	Bergmann glial cell at age P6, biological replicate 1	Mouse430_2
GSM462797.CEL.pimg	GSM462797	Bergmann glial cell at age P6, biological replicate 2	Mouse430_2
GSM462798.CEL.pimg	GSM462798	Bergmann glial cell at age P6, biological replicate 3	Mouse430_2
GSM462799.CEL.pimg	GSM462799	Bergmann glial cell at age P6, biological replicate 4	Mouse430_2
GSM462800.CEL.pimg	GSM462800	Bergmann glial cell at age P6, biological replicate 5	Mouse430_2
GSM462801.CEL.pimg	GSM462801	Bergmann glial cell at age P30, biological replicate 1	Mouse430_2
GSM462802.CEL.pimg	GSM462802	Bergmann glial cell at age P30, biological replicate 2	Mouse430_2
GSM462803.CEL.pimg	GSM462803	Bergmann glial cell at age P30, biological replicate 3	Mouse430_2
GSM462804.CEL.pimg	GSM462804	Bergmann glial cell at age P30, biological replicate 4	Mouse430_2
GSM462805.CEL.pimg	GSM462805	Bergmann glial cell at age P30, biological replicate 5	Mouse430_2
GSM465509.CEL.pimg	GSM465509	S1Pko liver Sample M535	Mouse430_2
GSM465510.CEL.pimg	GSM465510	S1Pko liver Sample M537	Mouse430_2
GSM465511.CEL.pimg	GSM465511	S1Pko liver Sample M539	Mouse430_2
GSM465512.CEL.pimg	GSM465512	S1Pko liver Sample M548	Mouse430_2
GSM465513.CEL.pimg	GSM465513	S1Pko liver Sample M558	Mouse430_2
GSM465514.CEL.pimg	GSM465514	S1Pko liver Sample M559	Mouse430_2
GSM490067.CEL.pimg	GSM490067	Wild Type, sample 1	Mouse430_2
GSM490068.CEL.pimg	GSM490068	Wild Type, sample 2	Mouse430_2
GSM490069.CEL.pimg	GSM490069	Wild Type, sample 3	Mouse430_2
GSM490070.CEL.pimg	GSM490070	Catalase-Tg, sample 1	Mouse430_2
GSM490071.CEL.pimg	GSM490071	Catalase-Tg, sample 2	Mouse430_2
GSM490072.CEL.pimg	GSM490072	Catalase-Tg, sample 3	Mouse430_2
GSM490073.CEL.pimg	GSM490073	dB/dB, sample 1	Mouse430_2
GSM490074.CEL.pimg	GSM490074	dB/dB, sample 2	Mouse430_2
GSM490075.CEL.pimg	GSM490075	dB/dB, sample 3	Mouse430_2
GSM490076.CEL.pimg	GSM490076	dB/dB Catalase-Tg, sample 1	Mouse430_2
GSM490077.CEL.pimg	GSM490077	dB/dB Catalase-Tg, sample 2	Mouse430_2
GSM490078.CEL.pimg	GSM490078	dB/dB Catalase-Tg, sample 3	Mouse430_2
GSM493930.CEL.pimg	GSM493930	Megalin-adult 10 week old, biological rep 1, TG	Mouse430_2
GSM493931.CEL.pimg	GSM493931	Megalin-adult 10 week old, biological rep 2, TG	Mouse430_2
GSM493932.CEL.pimg	GSM493932	Megalin-adult 10 week old, biological rep 3, TG	Mouse430_2
GSM493933.CEL.pimg	GSM493933	Megalin-adult 10 week old, biological rep 1, WT	Mouse430_2
GSM493934.CEL.pimg	GSM493934	Megalin-adult 10 week old, biological rep 2, WT	Mouse430_2
GSM493935.CEL.pimg	GSM493935	Megalin-adult 10 week old, biological rep 3, WT	Mouse430_2
GSM498222_PLX071220_clone11_vehicle1.CEL.pimg	?	?	Mouse430_2
GSM498223_PLX071220_clone11_vehicle2.CEL.pimg	?	?	Mouse430_2
GSM498224_PLX071220_clone11_vehicle3.CEL.pimg	?	?	Mouse430_2
GSM498225_PLX071220_clone11_dDAVP1.CEL.pimg	?	?	Mouse430_2
GSM498226_PLX071220_clone11_dDAVP2.CEL.pimg	?	?	Mouse430_2
GSM498227_PLX071220_clone11_dDAVP3.CEL.pimg	?	?	Mouse430_2
GSM507146.CEL.pimg	GSM507146	glomerulus_wildtype_biological replicate 1	Mouse430_2
GSM507147.CEL.pimg	GSM507147	glomerulus_wildtype_biological replicate 2	Mouse430_2
GSM507148.CEL.pimg	GSM507148	glomerulus_wildtype_biological replicate 3	Mouse430_2
GSM507149.CEL.pimg	GSM507149	glomerulus_transgenic_biological replicate 1	Mouse430_2
GSM507150.CEL.pimg	GSM507150	glomerulus_transgenic_biological replicate 2	Mouse430_2
GSM507151.CEL.pimg	GSM507151	glomerulus_transgenic_biological replicate 3	Mouse430_2
GSM509260.CEL.pimg	GSM509260	bcatGOF mouse kidney E12.5, biological rep 1	Mouse430_2
GSM509261.CEL.pimg	GSM509261	bcatGOF mouse kidney E12.5, biological rep 2	Mouse430_2
GSM509262.CEL.pimg	GSM509262	bcatGOF mouse kidney E12.5, biological rep 3	Mouse430_2
GSM518232.CEL.pimg	GSM518232	kidney of 2 month old, diabetic 1	Mouse430_2
GSM518233.CEL.pimg	GSM518233	kidney of 2 month old, diabetic 2	Mouse430_2
GSM518234.CEL.pimg	GSM518234	kidney of 2 month old, diabetic 3	Mouse430_2
GSM518235.CEL.pimg	GSM518235	kidney of 2 month old, diabetic 4	Mouse430_2
GSM518236.CEL.pimg	GSM518236	kidney of 2 month old, diabetic 5	Mouse430_2
GSM518237.CEL.pimg	GSM518237	kidney of 2 month old, diabetic 6	Mouse430_2
GSM518238.CEL.pimg	GSM518238	kidney of 2 month old, control 1	Mouse430_2
GSM518239.CEL.pimg	GSM518239	kidney of 2 month old, control 2	Mouse430_2
GSM518240.CEL.pimg	GSM518240	kidney of 2 month old, control 3	Mouse430_2
GSM518241.CEL.pimg	GSM518241	kidney of 2 month old, control 4	Mouse430_2
GSM518242.CEL.pimg	GSM518242	kidney of 2 month old, control 5	Mouse430_2
GSM518243.CEL.pimg	GSM518243	kidney of 2 month old, control 6	Mouse430_2
GSM518244.CEL.pimg	GSM518244	kidney of 4 month old, diabetic 1	Mouse430_2
GSM518245.CEL.pimg	GSM518245	kidney of 4 month old, diabetic 2	Mouse430_2
GSM518246.CEL.pimg	GSM518246	kidney of 4 month old, diabetic 3	Mouse430_2
GSM518247.CEL.pimg	GSM518247	kidney of 4 month old, diabetic 4	Mouse430_2
GSM518248.CEL.pimg	GSM518248	kidney of 4 month old, diabetic 5	Mouse430_2
GSM518249.CEL.pimg	GSM518249	kidney of 4 month old, diabetic 6	Mouse430_2
GSM518250.CEL.pimg	GSM518250	kidney of 4 month old, diabetic 7	Mouse430_2
GSM518251.CEL.pimg	GSM518251	kidney of 4 month old, control 1	Mouse430_2
GSM518252.CEL.pimg	GSM518252	kidney of 4 month old, control 2	Mouse430_2
GSM518253.CEL.pimg	GSM518253	kidney of 4 month old, control 3	Mouse430_2
GSM518254.CEL.pimg	GSM518254	kidney of 4 month old, control 4	Mouse430_2
GSM518255.CEL.pimg	GSM518255	kidney of 8 month old, diabetic 1	Mouse430_2
GSM518256.CEL.pimg	GSM518256	kidney of 8 month old, diabetic 2	Mouse430_2
GSM518257.CEL.pimg	GSM518257	kidney of 8 month old, diabetic 3	Mouse430_2
GSM518258.CEL.pimg	GSM518258	kidney of 8 month old, diabetic 4	Mouse430_2
GSM518259.CEL.pimg	GSM518259	kidney of 8 month old, diabetic 5	Mouse430_2
GSM518260.CEL.pimg	GSM518260	kidney of 8 month old, diabetic 6	Mouse430_2
GSM518261.CEL.pimg	GSM518261	kidney of 8 month old, control 1	Mouse430_2
GSM518262.CEL.pimg	GSM518262	kidney of 8 month old, control 2	Mouse430_2
GSM518263.CEL.pimg	GSM518263	kidney of 8 month old, control 3	Mouse430_2
GSM518264.CEL.pimg	GSM518264	kidney of 8 month old, control 4	Mouse430_2
GSM518265.CEL.pimg	GSM518265	kidney of 8 month old, control 5	Mouse430_2
GSM518266.CEL.pimg	GSM518266	kidney of 8 month old, control 6	Mouse430_2
GSM523960.cel.pimg	GSM523960	Mouse lung-embryo day 12-rep1	Mouse430_2
GSM523961.cel.pimg	GSM523961	Mouse lung-embryo day 12-rep2	Mouse430_2
GSM523962.cel.pimg	GSM523962	Mouse lung-embryo day 14-rep1	Mouse430_2
GSM523963.cel.pimg	GSM523963	Mouse lung-embryo day 14-rep2	Mouse430_2
GSM523964.cel.pimg	GSM523964	Mouse lung-embryo day 16-rep1	Mouse430_2
GSM523965.cel.pimg	GSM523965	Mouse lung-embryo day 16-rep2	Mouse430_2
GSM523966.cel.pimg	GSM523966	Mouse lung-embryo day 18-rep1	Mouse430_2
GSM523967.cel.pimg	GSM523967	Mouse lung-embryo day 18-rep2	Mouse430_2
GSM523968.cel.pimg	GSM523968	Mouse lung-postnatal day 2-rep1	Mouse430_2
GSM523969.cel.pimg	GSM523969	Mouse lung-postnatal day 2-rep2	Mouse430_2
GSM523970.cel.pimg	GSM523970	Mouse lung-postnatal day 10-rep1	Mouse430_2
GSM523971.cel.pimg	GSM523971	Mouse lung-postnatal day 10-rep2	Mouse430_2
GSM523972.cel.pimg	GSM523972	Mouse lung-postnatal day 30-rep1	Mouse430_2
GSM523973.cel.pimg	GSM523973	Mouse lung-postnatal day 30-rep2	Mouse430_2
GSM524183_YF060516MOT17.CEL.pimg	?	?	Mouse430_2
GSM524184_YF060516MOT18.CEL.pimg	?	?	Mouse430_2
GSM524185_YF060516MOT19.CEL.pimg	?	?	Mouse430_2
GSM524186_YF060516MOT14.CEL.pimg	?	?	Mouse430_2
GSM524187_YF060516MOT15.CEL.pimg	?	?	Mouse430_2
GSM524188_YF060516MOT16.CEL.pimg	?	?	Mouse430_2
GSM528589.CEL.pimg	GSM528589	Control littermate for VP16-CREB 3 weeks-induction sample 1	Mouse430_2
GSM528590.CEL.pimg	GSM528590	Control littermate for VP16-CREB 3 weeks-induction sample 2	Mouse430_2
GSM528591.CEL.pimg	GSM528591	Control littermate for VP16-CREB 3 weeks-induction sample 3	Mouse430_2
GSM528592.CEL.pimg	GSM528592	VP16-CREB 3 weeks-induced sample 1	Mouse430_2
GSM528593.CEL.pimg	GSM528593	VP16-CREB 3 weeks-induced sample 2	Mouse430_2
GSM528594.CEL.pimg	GSM528594	VP16-CREB 3 weeks-induced sample 3	Mouse430_2
GSM528595.CEL.pimg	GSM528595	Control littermate for VP16-CREB 1 week-induction sample 1	Mouse430_2
GSM528596.CEL.pimg	GSM528596	Control littermate for VP16-CREB 1 week-induction sample 2	Mouse430_2
GSM528597.CEL.pimg	GSM528597	VP16-CREB 1 week-induced sample 1	Mouse430_2
GSM528598.CEL.pimg	GSM528598	VP16-CREB 1 week-induced sample 2	Mouse430_2
GSM528601.CEL.pimg	GSM528601	Control littermate for A-CREB 6 weeks-old sample 1	Mouse430_2
GSM528602.CEL.pimg	GSM528602	Control littermate for A-CREB 6 weeks-old sample 2	Mouse430_2
GSM528616.CEL.pimg	GSM528616	Control littermate for A-CREB 6 weeks-old sample 3	Mouse430_2
GSM528617.CEL.pimg	GSM528617	A-CREB 6 weeks-old sample 1	Mouse430_2
GSM528618.CEL.pimg	GSM528618	A-CREB 6 weeks-old sample 2	Mouse430_2
GSM528619.CEL.pimg	GSM528619	A-CREB 6 weeks-old sample 3	Mouse430_2
GSM530635.CEL.pimg	GSM530635	Mouse liver_GD19_4	Mouse430_2
GSM530636.CEL.pimg	GSM530636	Mouse liver_GD19_5	Mouse430_2
GSM530637.CEL.pimg	GSM530637	Mouse liver_GD19_10	Mouse430_2
GSM530638.CEL.pimg	GSM530638	Mouse liver_GD19_18	Mouse430_2
GSM530639.CEL.pimg	GSM530639	Mouse liver_PND7_26	Mouse430_2
GSM530640.CEL.pimg	GSM530640	Mouse liver_PND7_29	Mouse430_2
GSM530641.CEL.pimg	GSM530641	Mouse liver_PND7_30	Mouse430_2
GSM530642.CEL.pimg	GSM530642	Mouse liver_PND7_31	Mouse430_2
GSM530643.CEL.pimg	GSM530643	Mouse liver_PND32_33	Mouse430_2
GSM530644.CEL.pimg	GSM530644	Mouse liver_PND32_34	Mouse430_2
GSM530645.CEL.pimg	GSM530645	Mouse liver_PND32_37	Mouse430_2
GSM530646.CEL.pimg	GSM530646	Mouse liver_PND32_40	Mouse430_2
GSM530647.CEL.pimg	GSM530647	Mouse liver_PND67_45	Mouse430_2
GSM530648.CEL.pimg	GSM530648	Mouse liver_PND67_46	Mouse430_2
GSM530649.CEL.pimg	GSM530649	Mouse liver_PND67_47	Mouse430_2
GSM530650.CEL.pimg	GSM530650	Mouse liver_PND67_49	Mouse430_2
GSM542346.CEL.pimg	GSM542346	TSC2+/+ p53-/-, biological replicate 1, no treatment	Mouse430_2
GSM542347.CEL.pimg	GSM542347	TSC2+/+ p53-/-, biological replicate 2, no treatment	Mouse430_2
GSM542348.CEL.pimg	GSM542348	TSC2+/+ p53-/-, biological replicate 3, no treatment	Mouse430_2
GSM542349.CEL.pimg	GSM542349	TSC2-/- p53-/-, biological replicate 1, no treatment	Mouse430_2
GSM542350.CEL.pimg	GSM542350	TSC2-/- p53-/-, biological replicate 2, no treatment	Mouse430_2
GSM542351.CEL.pimg	GSM542351	TSC2-/- p53-/-, biological replicate 3, no treatment	Mouse430_2
GSM542352.CEL.pimg	GSM542352	TSC1-/-, biological replicate 1, no treatment	Mouse430_2
GSM542353.CEL.pimg	GSM542353	TSC1-/-, biological replicate 2, no treatment	Mouse430_2
GSM542354.CEL.pimg	GSM542354	TSC1-/-, biological replicate 3, no treatment	Mouse430_2
GSM542355.CEL.pimg	GSM542355	TSC2-/- p53-/-, biological replicate 1, treated, time course 24 hours	Mouse430_2
GSM542356.CEL.pimg	GSM542356	TSC2-/- p53-/-, biological replicate 2, treated, time course 24 hours	Mouse430_2
GSM542357.CEL.pimg	GSM542357	TSC1-/-, biological replicate 1, treated, time course 24 hours	Mouse430_2
GSM542358.CEL.pimg	GSM542358	TSC1-/-, biological replicate 2, treated, time course 24 hours	Mouse430_2
GSM542359.CEL.pimg	GSM542359	TSC2-/- p53-/-, biological replicate 1, treated, time course 12 hours	Mouse430_2
GSM542360.CEL.pimg	GSM542360	TSC2-/- p53-/-, biological replicate 2, treated, time course 12 hours	Mouse430_2
GSM542361.CEL.pimg	GSM542361	TCS1-/-, biological replicate 1, treated, time course 12 hours	Mouse430_2
GSM542362.CEL.pimg	GSM542362	TSC1-/-, biological replicate 2, treated, time course 12 hours	Mouse430_2
GSM542363.CEL.pimg	GSM542363	TSC2-/- p53-/-, biological replicate 1, treated, time course 6 hours	Mouse430_2
GSM542364.CEL.pimg	GSM542364	TSC2-/- p53-/-, biological replicate 2, treated, time course 6 hours	Mouse430_2
GSM542365.CEL.pimg	GSM542365	TSC1-/-, biological replicate 1, treated, time course 6 hours	Mouse430_2
GSM542366.CEL.pimg	GSM542366	TSC1-/-, biological replicate 2, treated, time course 6 hours	Mouse430_2
GSM542367.CEL.pimg	GSM542367	TSC2-/- p53-/-, biological replicate 1, treated, time course 2 hours	Mouse430_2
GSM542368.CEL.pimg	GSM542368	TSC2-/- p53-/-, biological replicate 2, treated, time course 2 hours	Mouse430_2
GSM542369.CEL.pimg	GSM542369	TSC1-/-, biological replicate 1, treated, time course 2 hours	Mouse430_2
GSM542370.CEL.pimg	GSM542370	TSC1-/-, biological replicate 2, treated, time course 2 hours	Mouse430_2
GSM569090.CEL.pimg	GSM569090	wt_cochlea_1	Mouse430_2
GSM569091.CEL.pimg	GSM569091	wt_cochlea_2	Mouse430_2
GSM569092.CEL.pimg	GSM569092	wt_cochlea_3	Mouse430_2
GSM569093.CEL.pimg	GSM569093	wt_vestibule_1	Mouse430_2
GSM569094.CEL.pimg	GSM569094	wt_vestibule_2	Mouse430_2
GSM569095.CEL.pimg	GSM569095	wt_vestibule_3	Mouse430_2
GSM586842_Fz4_KO_1.CEL.pimg	?	?	Mouse430_2
GSM586843_Fz4_KO_2.CEL.pimg	?	?	Mouse430_2
GSM586844_Fz4_KO_3.CEL.pimg	?	?	Mouse430_2
GSM586845_Fz4_WT_1.CEL.pimg	?	?	Mouse430_2
GSM586846_Fz4_WT_2.CEL.pimg	?	?	Mouse430_2
GSM586847_Fz4_WT_3.CEL.pimg	?	?	Mouse430_2
GSM595367.CEL.pimg	GSM595367	Mouse diaphragm, biological replicate 1	Mouse430_2
GSM595368.CEL.pimg	GSM595368	Mouse diaphragm, biological replicate 2	Mouse430_2
GSM595369.CEL.pimg	GSM595369	Mouse diaphragm, biological replicate 3	Mouse430_2
GSM595370.CEL.pimg	GSM595370	Mouse spleen, biological replicate 1	Mouse430_2
GSM595371.CEL.pimg	GSM595371	Mouse spleen, biological replicate 2	Mouse430_2
GSM595372.CEL.pimg	GSM595372	Mouse spleen, biological replicate 3	Mouse430_2
GSM595373.CEL.pimg	GSM595373	Mouse muscle, biological replicate 1	Mouse430_2
GSM595374.CEL.pimg	GSM595374	Mouse muscle, biological replicate 2	Mouse430_2
GSM595375.CEL.pimg	GSM595375	Mouse muscle, biological replicate 3	Mouse430_2
GSM595376.CEL.pimg	GSM595376	Mouse muscle, biological replicate 4	Mouse430_2
GSM595377.CEL.pimg	GSM595377	Mouse liver, biological replicate 1	Mouse430_2
GSM595378.CEL.pimg	GSM595378	Mouse liver, biological replicate 2	Mouse430_2
GSM595379.CEL.pimg	GSM595379	Mouse liver, biological replicate 3	Mouse430_2
GSM595380.CEL.pimg	GSM595380	Mouse brain, biological replicate 1	Mouse430_2
GSM595381.CEL.pimg	GSM595381	Mouse brain, biological replicate 2	Mouse430_2
GSM595382.CEL.pimg	GSM595382	Mouse brain, biological replicate 3	Mouse430_2
GSM595383.CEL.pimg	GSM595383	Mouse lung, biological replicate 1	Mouse430_2
GSM595384.CEL.pimg	GSM595384	Mouse lung, biological replicate 2	Mouse430_2
GSM595385.CEL.pimg	GSM595385	Mouse lung, biological replicate 3	Mouse430_2
GSM595386.CEL.pimg	GSM595386	Mouse kidney, biological replicate 1	Mouse430_2
GSM595387.CEL.pimg	GSM595387	Mouse kidney, biological replicate 2	Mouse430_2
GSM595388.CEL.pimg	GSM595388	Mouse kidney, biological replicate 3	Mouse430_2
GSM595389.CEL.pimg	GSM595389	Mouse adrenal gland, biological replicate 1	Mouse430_2
GSM595390.CEL.pimg	GSM595390	Mouse adrenal gland, biological replicate 2	Mouse430_2
GSM595391.CEL.pimg	GSM595391	Mouse adrenal gland, biological replicate 3	Mouse430_2
GSM595392.CEL.pimg	GSM595392	Mouse bone marrow, biological replicate 1	Mouse430_2
GSM595393.CEL.pimg	GSM595393	Mouse bone marrow, biological replicate 2	Mouse430_2
GSM595394.CEL.pimg	GSM595394	Mouse bone marrow, biological replicate 3	Mouse430_2
GSM595395.CEL.pimg	GSM595395	Mouse bone marrow, biological replicate 4	Mouse430_2
GSM595396.CEL.pimg	GSM595396	Mouse adipose tissue, biological replicate 1	Mouse430_2
GSM595397.CEL.pimg	GSM595397	Mouse adipose tissue, biological replicate 2	Mouse430_2
GSM595398.CEL.pimg	GSM595398	Mouse adipose tissue, biological replicate 3	Mouse430_2
GSM595399.CEL.pimg	GSM595399	Mouse pituitary gland, biological replicate 1	Mouse430_2
GSM595400.CEL.pimg	GSM595400	Mouse pituitary gland, biological replicate 2	Mouse430_2
GSM595401.CEL.pimg	GSM595401	Mouse pituitary gland, biological replicate 3	Mouse430_2
GSM595402.CEL.pimg	GSM595402	Mouse pituitary gland, biological replicate 4	Mouse430_2
GSM595403.CEL.pimg	GSM595403	Mouse pituitary gland, biological replicate 5	Mouse430_2
GSM595404.CEL.pimg	GSM595404	Mouse salivary gland, biological replicate 1	Mouse430_2
GSM595405.CEL.pimg	GSM595405	Mouse salivary gland, biological replicate 2	Mouse430_2
GSM595406.CEL.pimg	GSM595406	Mouse salivary gland, biological replicate 3	Mouse430_2
GSM595408.CEL.pimg	GSM595408	Mouse seminal vesicle, biological replicate 1	Mouse430_2
GSM595409.CEL.pimg	GSM595409	Mouse seminal vesicle, biological replicate 2	Mouse430_2
GSM595410.CEL.pimg	GSM595410	Mouse seminal vesicle, biological replicate 3	Mouse430_2
GSM595412.CEL.pimg	GSM595412	Mouse thymus, biological replicate 1	Mouse430_2
GSM595413.CEL.pimg	GSM595413	Mouse thymus, biological replicate 2	Mouse430_2
GSM595415.CEL.pimg	GSM595415	Mouse thymus, biological replicate 3	Mouse430_2
GSM595418.CEL.pimg	GSM595418	Mouse testis, biological replicate 1	Mouse430_2
GSM595420.CEL.pimg	GSM595420	Mouse testis, biological replicate 2	Mouse430_2
GSM595430.CEL.pimg	GSM595430	Mouse testis, biological replicate 3	Mouse430_2
GSM595431.CEL.pimg	GSM595431	Mouse heart, biological replicate 1	Mouse430_2
GSM595433.CEL.pimg	GSM595433	Mouse heart, biological replicate 2	Mouse430_2
GSM595436.CEL.pimg	GSM595436	Mouse heart, biological replicate 3	Mouse430_2
GSM595438.CEL.pimg	GSM595438	Mouse small intestine, biological replicate 1	Mouse430_2
GSM595440.CEL.pimg	GSM595440	Mouse small intestine, biological replicate 2	Mouse430_2
GSM595442.CEL.pimg	GSM595442	Mouse small intestine, biological replicate 3	Mouse430_2
GSM595444.CEL.pimg	GSM595444	Mouse eye, biological replicate 1	Mouse430_2
GSM595446.CEL.pimg	GSM595446	Mouse eye, biological replicate 2	Mouse430_2
GSM595447.CEL.pimg	GSM595447	Mouse eye, biological replicate 3	Mouse430_2
GSM595448.CEL.pimg	GSM595448	Mouse placenta, biological replicate 1	Mouse430_2
GSM595449.CEL.pimg	GSM595449	Mouse placenta, biological replicate 2	Mouse430_2
GSM595450.CEL.pimg	GSM595450	Mouse placenta, biological replicate 3	Mouse430_2
GSM595451.CEL.pimg	GSM595451	Mouse ovary, biological replicate 1	Mouse430_2
GSM595452.CEL.pimg	GSM595452	Mouse ovary, biological replicate 2	Mouse430_2
GSM595453.CEL.pimg	GSM595453	Mouse ovary, biological replicate 3	Mouse430_2
GSM595454.CEL.pimg	GSM595454	Mouse pancreatic acini, biological replicate 1	Mouse430_2
GSM595455.CEL.pimg	GSM595455	Mouse pancreatic acini, biological replicate 2	Mouse430_2
GSM595456.CEL.pimg	GSM595456	Mouse pancreatic acini, biological replicate 3	Mouse430_2
GSM595457.CEL.pimg	GSM595457	Mouse pancreatic islets, biological replicate 1	Mouse430_2
GSM595458.CEL.pimg	GSM595458	Mouse pancreatic islets, biological replicate 2	Mouse430_2
GSM595459.CEL.pimg	GSM595459	Mouse pancreatic islets, biological replicate 3	Mouse430_2
GSM595460.CEL.pimg	GSM595460	Cell-line, MIN6, biological replicate 1	Mouse430_2
GSM595461.CEL.pimg	GSM595461	Cell-line, MIN6, biological replicate 2	Mouse430_2
GSM595462.CEL.pimg	GSM595462	Cell-line, MIN6, biological replicate 3	Mouse430_2
GSM597071.CEL.pimg	GSM597071	Fz1-/-; Fz2+/+ E13.5 palate replicate 1	Mouse430_2
GSM597072.CEL.pimg	GSM597072	Fz1-/-; Fz2-/- E13.5 palate replicate 1	Mouse430_2
GSM597073.CEL.pimg	GSM597073	Fz1-/-; Fz2+/+ E13.5 palate replicate 2	Mouse430_2
GSM597074.CEL.pimg	GSM597074	Fz1-/-; Fz2-/- E13.5 palate replicate 2	Mouse430_2
GSM597075.CEL.pimg	GSM597075	Fz1-/-; Fz2+/+ E13.5 palate replicate 3	Mouse430_2
GSM597076.CEL.pimg	GSM597076	Fz1-/-; Fz2-/- E13.5 palate replicate 3	Mouse430_2
GSM651584.CEL.pimg	GSM651584	602 wild type	Mouse430_2
GSM651585.CEL.pimg	GSM651585	603 Smad1 CKO	Mouse430_2
GSM651586.CEL.pimg	GSM651586	638 wild type	Mouse430_2
GSM651587.CEL.pimg	GSM651587	639 Smad1 CKO	Mouse430_2
GSM651588.CEL.pimg	GSM651588	278 wild type	Mouse430_2
GSM651589.CEL.pimg	GSM651589	279 Smad1 CKO	Mouse430_2
GSM656393.CEL.pimg	GSM656393	Fz4Fz8 DKO C1	Mouse430_2
GSM656394.CEL.pimg	GSM656394	Fz4Fz8 DKO C2	Mouse430_2
GSM656395.CEL.pimg	GSM656395	Fz4Fz8 DKO C3	Mouse430_2
GSM656396.CEL.pimg	GSM656396	Fz4Fz8 DKO M1	Mouse430_2
GSM656397.CEL.pimg	GSM656397	Fz4Fz8 DKO M2	Mouse430_2
GSM656398.CEL.pimg	GSM656398	Fz4Fz8 DKO M3	Mouse430_2
GSM658893_TV01M001.CEL.pimg	?	?	Mouse430_2
GSM658894_TV01M002.CEL.pimg	?	?	Mouse430_2
GSM658895_TV01M003.CEL.pimg	?	?	Mouse430_2
GSM658896_TV01M004.CEL.pimg	?	?	Mouse430_2
GSM658897_TV01M005.CEL.pimg	?	?	Mouse430_2
GSM658898_TV01M006.CEL.pimg	?	?	Mouse430_2
GSM658899_TV01M007.CEL.pimg	?	?	Mouse430_2
GSM658900_TV01M008.CEL.pimg	?	?	Mouse430_2
GSM658901_TV01M009.CEL.pimg	?	?	Mouse430_2
GSM658902_TV01M010.CEL.pimg	?	?	Mouse430_2
GSM658903_TV01M011.CEL.pimg	?	?	Mouse430_2
GSM658904_TV01M012.CEL.pimg	?	?	Mouse430_2
GSM69792.CEL.pimg	GSM69792	HNF4 Control_8	Mouse430_2
GSM69793.CEL.pimg	GSM69793	HNF4 Control_1192	Mouse430_2
GSM69794.CEL.pimg	GSM69794	HNF4 Control_1193	Mouse430_2
GSM69795.CEL.pimg	GSM69795	HNF4 Null_61	Mouse430_2
GSM69796.CEL.pimg	GSM69796	HNF4 Null_1191	Mouse430_2
GSM69797.CEL.pimg	GSM69797	HNF4 Null_1195	Mouse430_2
GSM724600_EA0271_01.CEL.pimg	?	?	Mouse430_2
GSM724601_EA0271_02.CEL.pimg	?	?	Mouse430_2
GSM737978.CEL.pimg	GSM737978	E12 spiral ganglion E12_SG_1	Mouse430_2
GSM737979.CEL.pimg	GSM737979	E12 spiral ganglion E12_SG_2	Mouse430_2
GSM737980.CEL.pimg	GSM737980	E12 spiral ganglion E12_SG_3	Mouse430_2
GSM737981.CEL.pimg	GSM737981	E13 spiral ganglion E13_SG_1	Mouse430_2
GSM737982.CEL.pimg	GSM737982	E13 spiral ganglion E13_SG_2	Mouse430_2
GSM737983.CEL.pimg	GSM737983	E13 spiral ganglion E13_SG_3	Mouse430_2
GSM737984.CEL.pimg	GSM737984	E16 spiral ganglion neurons E16_SG_1	Mouse430_2
GSM737985.CEL.pimg	GSM737985	E16 spiral ganglion neurons E16_SG_2	Mouse430_2
GSM737986.CEL.pimg	GSM737986	E16 spiral ganglion neurons E16_SG_3	Mouse430_2
GSM737987.CEL.pimg	GSM737987	E16 spiral ganglion neurons E16_SG_4	Mouse430_2
GSM737988.CEL.pimg	GSM737988	P0 spiral ganglion neurons P0_SG_1	Mouse430_2
GSM737989.CEL.pimg	GSM737989	P0 spiral ganglion neurons P0_SG_2	Mouse430_2
GSM737990.CEL.pimg	GSM737990	P0 spiral ganglion neurons P0_SG_3	Mouse430_2
GSM737991.CEL.pimg	GSM737991	P0 spiral ganglion neurons P0_SG_4	Mouse430_2
GSM737992.CEL.pimg	GSM737992	P6 spiral ganglion neurons P6_SG_1	Mouse430_2
GSM737993.CEL.pimg	GSM737993	P6 spiral ganglion neurons P6_SG_2	Mouse430_2
GSM737994.CEL.pimg	GSM737994	P6 spiral ganglion neurons P6_SG_3	Mouse430_2
GSM737995.CEL.pimg	GSM737995	P6 spiral ganglion neurons P6_SG_4	Mouse430_2
GSM737996.CEL.pimg	GSM737996	P15 spiral ganglion neurons P15_SG_1	Mouse430_2
GSM737997.CEL.pimg	GSM737997	P15 spiral ganglion neurons P15_SG_2	Mouse430_2
GSM737998.CEL.pimg	GSM737998	P15 spiral ganglion neurons P15_SG_3	Mouse430_2
GSM737999.CEL.pimg	GSM737999	P15 spiral ganglion neurons P15_SG_4	Mouse430_2
GSM738000.CEL.pimg	GSM738000	E12 vestibular ganglion E12_VG_1	Mouse430_2
GSM738001.CEL.pimg	GSM738001	E12 vestibular ganglion E12_VG_2	Mouse430_2
GSM738002.CEL.pimg	GSM738002	E12 vestibular ganglion E12_VG_3	Mouse430_2
GSM738003.CEL.pimg	GSM738003	E13 vestibular ganglion E13_VG_1	Mouse430_2
GSM738004.CEL.pimg	GSM738004	E13 vestibular ganglion E13_VG_2	Mouse430_2
GSM738005.CEL.pimg	GSM738005	E13 vestibular ganglion E13_VG_3	Mouse430_2
GSM738006.CEL.pimg	GSM738006	E16 vestibular ganglion E16_VG_1	Mouse430_2
GSM738007.CEL.pimg	GSM738007	E16 vestibular ganglion E16_VG_2	Mouse430_2
GSM738008.CEL.pimg	GSM738008	E16 vestibular ganglion E16_VG_3	Mouse430_2
GSM738009.CEL.pimg	GSM738009	P0 vestibular ganglion P0_VG_1	Mouse430_2
GSM738010.CEL.pimg	GSM738010	P0 vestibular ganglion P0_VG_2	Mouse430_2
GSM738011.CEL.pimg	GSM738011	P0 vestibular ganglion P0_VG_3	Mouse430_2
GSM738012.CEL.pimg	GSM738012	P6 vestibular ganglion P6_VG_1	Mouse430_2
GSM738013.CEL.pimg	GSM738013	P6 vestibular ganglion P6_VG_2	Mouse430_2
GSM738014.CEL.pimg	GSM738014	P6 vestibular ganglion P6_VG_3	Mouse430_2
GSM738015.CEL.pimg	GSM738015	P15 vestibular ganglion P15_VG_1	Mouse430_2
GSM738016.CEL.pimg	GSM738016	P15 vestibular ganglion P15_VG_2	Mouse430_2
GSM738017.CEL.pimg	GSM738017	P15 vestibular ganglion P15_VG_3	Mouse430_2
GSM747173.CEL.pimg	GSM747173	RAinduction-WT-A	Mouse430_2
GSM747174.CEL.pimg	GSM747174	RAinduction-WT-B	Mouse430_2
GSM747175.CEL.pimg	GSM747175	RAinduction-WT-C	Mouse430_2
GSM747176.CEL.pimg	GSM747176	RAinduction-2HR-A	Mouse430_2
GSM747177.CEL.pimg	GSM747177	RAinduction-2HR-B	Mouse430_2
GSM747178.CEL.pimg	GSM747178	RAinduction-2HR-C	Mouse430_2
GSM747179.CEL.pimg	GSM747179	RAinduction-4HR-A	Mouse430_2
GSM747180.CEL.pimg	GSM747180	RAinduction-4HR-B	Mouse430_2
GSM747181.CEL.pimg	GSM747181	RAinduction-4HR-C	Mouse430_2
GSM747182.CEL.pimg	GSM747182	RAinduction-6HR-A	Mouse430_2
GSM747183.CEL.pimg	GSM747183	RAinduction-6HR-B	Mouse430_2
GSM747184.CEL.pimg	GSM747184	RAinduction-6HR-C	Mouse430_2
GSM816522.CEL.pimg	GSM816522	beta-catenin-WT_dermis_neonatal_biological_replicate_1	Mouse430_2
GSM816523.CEL.pimg	GSM816523	beta-catenin-WT_dermis_neonatal_biological_replicate_2	Mouse430_2
GSM816524.CEL.pimg	GSM816524	beta-catenin-WT_dermis_neonatal_biological_replicate_3	Mouse430_2
GSM816525.CEL.pimg	GSM816525	beta-catenin-WT_epidermis_neonatal_biological_replicate_2	Mouse430_2
GSM816526.CEL.pimg	GSM816526	beta-catenin-WT_epidermis_neonatal_biological_replicate_3	Mouse430_2
GSM816527.CEL.pimg	GSM816527	beta-catenin-WT_epidermis_neonatal_biological_replicate_4	Mouse430_2
GSM816528.CEL.pimg	GSM816528	beta-catenin-WT_dermis_telogen_biological_replicate_2	Mouse430_2
GSM816529.CEL.pimg	GSM816529	beta-catenin-WT_dermis_telogen_biological_replicate_3	Mouse430_2
GSM816530.CEL.pimg	GSM816530	beta-catenin-WT_dermis_telogen_biological_replicate_4	Mouse430_2
GSM816531.CEL.pimg	GSM816531	beta-catenin-WT_epidermis_telogen_biological_replicate_2	Mouse430_2
GSM816532.CEL.pimg	GSM816532	beta-catenin-WT_epidermis_telogen_biological_replicate_3	Mouse430_2
GSM816533.CEL.pimg	GSM816533	beta-catenin-WT_epidermis_telogen_biological_replicate_4	Mouse430_2
GSM816534.CEL.pimg	GSM816534	beta-catenin-D2_dermis_transient_activation_biological_replicate_2	Mouse430_2
GSM816535.CEL.pimg	GSM816535	beta-catenin-D2_dermis_transient_activation_biological_replicate_3	Mouse430_2
GSM816536.CEL.pimg	GSM816536	beta-catenin-D2_dermis_transient_activation_biological_replicate_4	Mouse430_2
GSM816537.CEL.pimg	GSM816537	beta-catenin-D2_epidermis_transient_activation_biological_replicate_2	Mouse430_2
GSM816538.CEL.pimg	GSM816538	beta-catenin-D2_epidermis_transient_activation_biological_replicate_3	Mouse430_2
GSM816539.CEL.pimg	GSM816539	beta-catenin-D2_epidermis_transient_activation_biological_replicate_4	Mouse430_2
GSM816540.CEL.pimg	GSM816540	beta-catenin-D2_dermis_sustained_activation_biological_replicate_2	Mouse430_2
GSM816541.CEL.pimg	GSM816541	beta-catenin-D2_dermis_sustained_activation_biological_replicate_3	Mouse430_2
GSM816542.CEL.pimg	GSM816542	beta-catenin-D2_dermis_sustained_activation_biological_replicate_5	Mouse430_2
GSM816543.CEL.pimg	GSM816543	beta-catenin-D2_epidermis_sustained_activation_biological_replicate_2	Mouse430_2
GSM816544.CEL.pimg	GSM816544	beta-catenin-D2_epidermis_sustained_activation_biological_replicate_3	Mouse430_2
GSM816545.CEL.pimg	GSM816545	beta-catenin-D2_epidermis_sustained_activation_biological_replicate_5	Mouse430_2
GSM87677.CEL.pimg	GSM87677	HoxA11, D11 double null embryonic E11.5 Metanephric Mesenchyme replicate 1	Mouse430_2
GSM87678.CEL.pimg	GSM87678	Wild type embryonic E11.5 Metanephric Mesenchyme replicate 5	Mouse430_2
GSM87679.CEL.pimg	GSM87679	Wild type embryonic E11.5 Ureteric Bud replicate 1	Mouse430_2
GSM87680.CEL.pimg	GSM87680	Wild type embryonic E11.5 Ureteric Bud replicate 2	Mouse430_2
GSM87681.CEL.pimg	GSM87681	Wildtype embryonic E11.5 Metanephric Mesenchyme replicate 1	Mouse430_2
GSM87682.CEL.pimg	GSM87682	Wild type embryonic E11.5 Metanephric Mesenchyme replicate 6	Mouse430_2
GSM87683.CEL.pimg	GSM87683	Wildtype embryonic E11.5 Metanephric Mesenchyme replicate 2	Mouse430_2
GSM87684.CEL.pimg	GSM87684	Wild type embryonic E11.5 Ureteric Bud replicate 3	Mouse430_2
GSM87685.CEL.pimg	GSM87685	Wild type embryonic E11.5 Ureteric Bud replicate 4	Mouse430_2
GSM87686.CEL.pimg	GSM87686	Wildtype embryonic E11.5 Metanephric Mesenchyme replicate 3	Mouse430_2
GSM87687.CEL.pimg	GSM87687	Wild type embryonic E11.5 Metanephric Mesenchyme replicate 7	Mouse430_2
GSM87688.CEL.pimg	GSM87688	Wildtype embryonic E11.5 Metanephric Mesenchyme replicate 4	Mouse430_2
GSM87689.CEL.pimg	GSM87689	HoxA11, D11 double null embryonic E11.5 Metanephric Mesenchyme replicate 2	Mouse430_2
GSM87690.CEL.pimg	GSM87690	HoxA11, D11 double null embryonic E11.5 Metanephric Mesenchyme replicate 3	Mouse430_2
GSM87691.CEL.pimg	GSM87691	HoxA11, D11 double null embryonic E11.5 Metanephric Mesenchyme replicate 4	Mouse430_2
GSM87692.CEL.pimg	GSM87692	HoxA11, D11 double null embryonic E11.5 Metanephric Mesenchyme replicate 5	Mouse430_2
GSM96563.CEL.pimg	GSM96563	Lim1-E14.5_Control_Kidney_array1	Mouse430_2
GSM96564.CEL.pimg	GSM96564	Lim1-E14.5_Control_Kidney_array2	Mouse430_2
GSM96565.CEL.pimg	GSM96565	Lim1-E14.5_Mutant_Kidney_array1	Mouse430_2
GSM96566.CEL.pimg	GSM96566	Lim1-E14.5_Mutant_Kidney_array2	Mouse430_2
GSM96567.CEL.pimg	GSM96567	Lim1-E18.5_Control_Kidney_array1	Mouse430_2
GSM96568.CEL.pimg	GSM96568	Lim1-E18.5_Control_Kidney_array2	Mouse430_2
GSM96569.CEL.pimg	GSM96569	Lim1-E18.5_Mutant_Kidney_array1	Mouse430_2
GSM96570.CEL.pimg	GSM96570	Lim1-E18.5_Mutant_Kidney_array2	Mouse430_2
GSM99421.cel.pimg	GSM99421	skeletal muscle, tibialis anterior: Denervated 3-day Control 1_e1_le1	Mouse430_2
GSM99422.cel.pimg	GSM99422	skeletal muscle, tibialis anterior: Denervated 3-day Control 2_e1_le1	Mouse430_2
GSM99423.cel.pimg	GSM99423	skeletal muscle, tibialis anterior: Denervated 3-day Control 3_e1_le1	Mouse430_2
GSM99424.cel.pimg	GSM99424	skeletal muscle, tibialis anterior: Innverated MCK::cre 1_e1_le1	Mouse430_2
GSM99425.cel.pimg	GSM99425	skeletal muscle, tibialis anterior: Innervated MCK::cre 2_e1_le1	Mouse430_2
GSM99426.cel.pimg	GSM99426	skeletal muscle, tibialis anterior: Denervated 3-day MCK::cre 1_e1_le1	Mouse430_2
GSM99427.cel.pimg	GSM99427	skeletal muscle, tibialis anterior: Denervated 3-day MCK::cre 2_e1_le1	Mouse430_2
GSM99428.cel.pimg	GSM99428	skeletal muscle, tibialis anterior: Denervated 3-day MCK::cre 3_e1_le1	Mouse430_2
GSM99429.cel.pimg	GSM99429	skeletal muscle, tibialis anterior: Innvervated Control 1_e1_le1	Mouse430_2
GSM99430.cel.pimg	GSM99430	skeletal muscle, tibialis anterior: Innvervated Control 2_e1_le1	Mouse430_2
GSM99431.cel.pimg	GSM99431	skeletal muscle, tibialis anterior: Innvervated Control 3_e1_le1	Mouse430_2
