# Supplementary material for: Network Analysis of a Pkd1-Mouse Model of Autosomal Dominant Polycystic Kidney Disease Identifies HNF4α as a Disease Modifier
Source: PLoS Genet. 2012 Nov 29;8(11):e1003053. doi: 10.1371/journal.pgen.1003053 (PMC3510057; doi:10.1371/journal.pgen.1003053)
Supplement: Table S14 — Differentially detected mass spectra in the negative electrospray ionization mode. (XLS) [file pgen.1003053.s015.xls]

## Sheet: Sheet1
Table S14. Differentially detected mass spectra in the negative electrospray ionization mode.
m/z @ retention time	qvalue(p-value)	FoldChange (Control/Mutant)
171.0055@0.3208	1.42918e-10	0.23079
372.1842@5.7135	1.48142e-10	11.3613
424.9088@0.276	1.48142e-10	0.190189
450.8262@0.3199	1.48142e-10	0.232045
401.1943@5.3428	1.73464e-10	10.1084
548.8092@0.3272	1.97468e-10	0.108754
352.8493@0.3111	1.97468e-10	0.221099
202.9042@0.2774	2.40146e-10	0.144393
586.755@0.3151	6.64428e-10	0.16913
282.9891@1.447	6.64428e-10	0.202854
193.0588@1.4912	7.21746e-10	0.255889
333.1553@5.4366	8.38521e-10	4.22519
197.0635@5.3155	3.10661e-09	3.28355
847.9622@4.9978	3.36345e-09	6.82988
260.0541@2.78	3.39343e-09	0.221841
415.2105@5.4627	4.51343e-09	7.51987
96.9613@0.354	4.51343e-09	0.304083
370.1681@5.4727	4.51343e-09	5.58438
359.1716@5.8788	4.51343e-09	9.89926
289.9456@0.259	4.51343e-09	0.391188
401.2172@5.5943	4.59965e-09	4.97713
343.1362@5.4216	5.54707e-09	3.81192
74.0251@4.5656	5.7721e-09	6.48009
120.045@3.4316	6.01908e-09	3.76326
290.1418@5.2117	6.55179e-09	8.18671
194.9315@0.35	7.07491e-09	0.303811
286.8656@0.2769	7.40812e-09	0.125629
364.1801@5.1396	8.37896e-09	6.2412
232.8983@0.3073	9.73599e-09	0.240211
286.1654@5.1012	1.33535e-08	7.25892
488.7782@0.3012	1.40517e-08	0.277895
333.0272@2.6411	1.54091e-08	10.1844
280.1189@4.7998	1.5972e-08	3.41981
330.0571@2.2738	2.03536e-08	0.214396
262.9296@0.2586	2.03536e-08	0.471777
179.056@1.8666	2.45066e-08	3.40499
388.18@5.1427	2.76497e-08	8.06351
439.0593@2.7698	2.96567e-08	0.289806
310.7989@0.2986	3.01679e-08	0.205102
215.9972@1.7844	3.05905e-08	12.4621
175.9676@0.2591	3.09679e-08	0.391978
288.9365@0.2588	3.11998e-08	0.34287
450.7338@0.2924	3.17701e-08	0.11965
158.9777@0.2599	3.17701e-08	0.496005
284.1497@4.7484	3.33101e-08	5.04402
301.0385@2.8088	3.40825e-08	6.55423
292.8245@0.2795	3.40825e-08	0.19873
203.001@1.5295	3.43394e-08	3.14108
303.0696@1.1264	3.997e-08	0.16602
259.0137@0.3135	3.997e-08	0.39859
493.0119@1.6648	4.06929e-08	16.9556
109.0291@2.6172	5.00239e-08	10.8543
151.0391@2.872	5.39136e-08	6.37062
303.0175@1.7939	5.65953e-08	17.8408
425.0119@2.0254	5.65953e-08	29.9276
412.8706@0.3362	6.35585e-08	0.347309
288.0908@5.15	6.35585e-08	11.4574
199.0788@5.5327	6.88182e-08	3.21922
290.9394@0.2765	6.88182e-08	0.346811
197.1524@4.9786	7.27359e-08	4.42078
310.969@0.4384	7.84981e-08	0.243443
466.8038@0.3206	8.17863e-08	0.228653
93.0346@3.1126	8.17863e-08	4.96616
78.9594@0.3075	8.17863e-08	0.447524
848.4632@5.0104	8.53479e-08	7.45135
253.0499@4.1116	8.62203e-08	9.0831
229.017@2.4753	1.14168e-07	6.71157
385.1213@2.8539	1.15807e-07	14.4113
410.7483@0.2927	1.20406e-07	0.245327
226.9651@0.2694	1.27261e-07	0.208002
333.0074@4.1223	1.27261e-07	7.25441
584.109@2.1631	1.34649e-07	10.2515
398.0446@0.4209	1.34649e-07	0.116861
373.186@6.0803	1.41277e-07	4.9582
336.1481@4.243	1.52331e-07	4.7381
445.0779@3.8767	1.53046e-07	15.733
372.7933@0.2909	1.55243e-07	0.34539
215.1028@0.9899	1.57019e-07	12.7338
466.7102@0.2932	1.57019e-07	0.10064
319.1307@4.9823	1.66857e-07	8.48446
363.0104@0.3985	1.76317e-07	0.242302
113.0242@3.9004	1.89771e-07	4.65927
366.7599@0.2932	1.90065e-07	0.114462
263.0221@1.1928	1.94206e-07	9.34688
193.0293@0.3021	1.94206e-07	0.445309
242.1386@3.8208	2.0366e-07	6.74759
212.0014@3.3193	2.0366e-07	11.2696
343.9723@0.3839	2.08865e-07	0.220703
428.8485@0.3339	2.09376e-07	0.31674
124.9911@0.3191	2.09376e-07	0.463159
284.1247@1.8372	2.20524e-07	4.23894
385.1859@5.4496	2.20524e-07	2.81012
175.024@3.907	2.20524e-07	6.13476
114.9937@0.3028	2.20753e-07	0.452727
344.0403@0.6604	2.31037e-07	3.68542
347.1345@3.8693	2.72881e-07	11.274
194.0448@3.1135	2.93528e-07	3.33865
368.0578@3.2818	2.93839e-07	0.155213
119.0499@2.2986	2.94211e-07	6.03029
149.0601@2.4773	2.97489e-07	5.66474
314.8907@0.3394	3.09819e-07	0.2769
211.0574@1.9228	3.10163e-07	0.300278
337.0382@4.4667	3.11919e-07	13.5925
316.8864@0.2757	3.78796e-07	0.325696
139.1118@4.9114	3.79209e-07	3.2048
349.0022@4.7418	3.89431e-07	17.9181
270.9434@0.2585	3.93686e-07	0.413098
279.1444@5.6244	4.00474e-07	6.52862
150.0552@3.1139	4.03237e-07	3.77548
402.9166@0.2588	4.11289e-07	0.382299
404.1819@4.0176	4.34826e-07	2.61876
301.0384@3.3406	4.46308e-07	4.56244
188.0918@1.4401	4.82828e-07	2.53529
481.0712@0.6907	4.82828e-07	9.06704
199.0064@3.8544	5.12813e-07	7.65845
321.0436@4.721	5.20929e-07	8.76182
472.8009@0.3083	5.56381e-07	0.285612
310.953@1.6821	6.00575e-07	3.88064
346.8167@0.3834	6.08346e-07	0.0854296
340.9641@1.6337	6.33966e-07	20.2046
340.9457@0.2746	6.4146e-07	0.28458
159.0652@2.0542	6.44438e-07	0.253794
399.1631@3.6022	6.5027e-07	7.7156
326.7715@0.2934	6.70734e-07	0.178232
269.0449@4.7305	6.8731e-07	16.6846
215.0012@3.5411	7.38464e-07	7.37221
342.1377@5.9108	7.67405e-07	4.29732
228.9679@0.2591	7.67405e-07	0.423669
737.1567@1.5387	7.77017e-07	7.48109
427.2013@5.6336	8.11257e-07	7.5547
426.7189@0.2934	8.37923e-07	0.164514
446.7277@0.2982	8.63311e-07	0.188853
125.0241@0.7113	8.63311e-07	4.94339
439.1606@4.8016	8.67089e-07	3.81787
230.0119@1.9	8.91608e-07	6.33589
502.6855@0.2933	9.0038e-07	0.119184
291.0975@2.007	9.19967e-07	0.304489
273.007@3.5234	9.54326e-07	5.61032
258.9924@2.3136	9.82496e-07	4.44994
308.7993@0.2877	9.87316e-07	0.205779
715.1748@1.5363	1.03623e-06	16.9552
322.0241@2.7584	1.05203e-06	0.143701
328.9643@2.5281	1.06673e-06	0.151349
286.0894@1.4941	1.13408e-06	0.32594
380.1743@4.3156	1.17283e-06	8.74096
147.0654@0.855	1.1995e-06	3.13823
123.0447@1.5246	1.25796e-06	2.66783
132.0296@2.7732	1.31383e-06	4.27241
175.0239@5.4732	1.43258e-06	4.06954
429.1811@5.5217	1.45218e-06	3.93428
273.1701@4.74	1.45218e-06	3.33368
247.0009@0.4604	1.45857e-06	0.301812
334.1329@3.6041	1.45877e-06	2.87761
359.9463@0.3837	1.48553e-06	0.192441
429.0825@3.1968	1.48553e-06	4.95774
289.0383@3.0556	1.49409e-06	7.69666
330.8622@0.3428	1.58827e-06	0.336584
412.7697@0.2895	1.63224e-06	0.316435
422.0617@0.3314	1.63224e-06	0.242984
130.9743@0.2599	1.63224e-06	0.226011
254.136@4.351	1.63224e-06	3.49112
310.928@0.2767	1.69025e-06	0.214932
264.9298@0.2767	1.78164e-06	0.471762
421.1481@5.2235	1.7851e-06	2.85563
394.8887@0.2735	1.80678e-06	0.15187
407.2061@4.2731	1.81849e-06	4.93458
209.042@1.9971	1.83999e-06	0.339125
276.0628@1.4752	1.84263e-06	0.320329
331.1765@5.7776	1.84263e-06	3.42775
79.9577@0.3496	1.94505e-06	0.480852
248.8989@0.2793	1.95816e-06	0.444309
317.1592@5.4683	2.01173e-06	4.3517
153.0184@2.615	2.03048e-06	5.47358
361.1716@4.7266	2.05741e-06	3.64704
425.1792@5.4028	2.09024e-06	8.86512
337.0387@4.7027	2.0929e-06	7.33241
163.0392@2.2856	2.18108e-06	3.76769
108.9026@0.2932	2.19079e-06	0.199049
297.17@5.2126	2.19079e-06	4.34563
113.0243@1.5489	2.22964e-06	6.27366
351.0691@3.3069	2.38273e-06	0.263696
341.0403@3.2854	2.42822e-06	0.198521
368.8262@0.3095	2.43358e-06	0.322111
407.0981@4.2529	2.48473e-06	4.14917
401.1807@3.1397	2.48473e-06	3.4181
445.1147@5.1883	2.48473e-06	4.44675
388.7672@0.2928	2.48473e-06	0.335995
157.1042@5.6443	2.48473e-06	2.74881
265.1188@3.9453	2.48473e-06	11.7481
368.0892@1.5772	2.48723e-06	0.398385
564.7853@0.3246	2.49162e-06	0.16053
384.7324@0.3016	2.49901e-06	0.130038
456.2226@5.2016	2.50656e-06	2.38514
428.7481@0.2908	2.50847e-06	0.313825
94.9809@0.3247	2.54453e-06	0.420591
516.8974@0.2589	2.54453e-06	0.419064
165.0548@3.2446	2.60137e-06	9.07597
380.1543@1.7606	2.83358e-06	3.41559
415.2336@4.8117	2.85682e-06	0.208339
317.0337@2.5823	2.92367e-06	10.461
164.0705@2.7932	2.9796e-06	9.18814
254.9821@0.3831	3.13137e-06	0.482828
467.1939@5.3141	3.14085e-06	4.87323
360.1487@5.4393	3.15712e-06	4.80856
591.3538@6.3612	3.29816e-06	3.86856
265.102@0.7233	3.30875e-06	11.1517
245.1134@0.5753	3.39573e-06	5.09177
371.1341@3.0846	3.39573e-06	5.73685
363.164@3.1247	3.39573e-06	2.59483
282.1348@4.9872	3.39573e-06	3.12797
198.9148@0.2959	3.39573e-06	0.342793
276.8504@0.2867	3.4442e-06	0.237808
332.1174@3.3971	3.4442e-06	4.61395
351.1195@0.5435	3.52325e-06	0.484527
193.0499@2.4908	3.62587e-06	3.08063
288.1191@0.8849	3.69703e-06	3.57368
343.0258@4.6882	3.85366e-06	6.85637
79.9577@2.4559	3.95884e-06	9.41331
293.0157@3.0341	4.03133e-06	5.76341
266.8082@0.2936	4.04388e-06	0.144721
181.0498@1.6539	4.07387e-06	3.44195
368.7587@0.3015	4.12293e-06	0.126905
138.9707@0.3248	4.12771e-06	0.392362
243.1336@1.8028	4.13002e-06	2.36623
175.0239@0.3829	4.13002e-06	0.490638
407.1224@2.7596	4.34234e-06	0.454133
282.0053@0.5724	4.52393e-06	0.482587
335.041@2.8554	4.52393e-06	6.9169
397.1145@3.2029	4.5503e-06	3.81096
252.9782@1.7813	4.5503e-06	0.467441
706.7155@0.3024	4.55932e-06	0.170481
273.1698@5.0589	4.55932e-06	7.9107
295.1535@5.2909	4.67526e-06	2.66082
403.2327@5.3521	4.69648e-06	3.02942
113.024@5.4576	4.91174e-06	2.80241
306.1374@4.1608	4.91174e-06	3.12054
462.6994@0.3013	4.91174e-06	0.143804
524.6846@0.2951	4.91174e-06	0.236573
342.0884@1.1089	5.04539e-06	3.27097
385.186@4.1915	5.07172e-06	7.30165
602.7337@0.315	5.07172e-06	0.205448
722.6858@0.3058	5.15446e-06	0.186369
622.1794@2.7652	5.32388e-06	0.360404
273.9516@0.5949	5.32388e-06	2.97054
242.9965@2.3014	5.32861e-06	3.15339
398.9933@0.6397	5.35089e-06	4.63925
266.9945@2.5398	5.35089e-06	0.351712
390.7982@0.2929	5.35089e-06	0.343672
211.0382@0.8237	5.35089e-06	3.93663
251.1275@4.3914	5.35229e-06	4.98547
569.3342@5.3278	5.56086e-06	7.60431
230.9962@1.1056	5.66936e-06	3.5269
301.111@5.2394	5.71384e-06	7.70204
229.1439@4.9466	5.71384e-06	3.87851
556.2408@2.7382	6.59368e-06	3.5935
291.986@1.8297	7.11668e-06	0.48274
229.0169@4.499	7.13586e-06	11.3552
356.9219@0.2768	7.13586e-06	0.288246
295.1296@3.0167	7.24577e-06	5.00562
340.0667@0.4731	7.87623e-06	0.216143
425.1484@4.4584	7.87677e-06	3.79817
229.1182@1.2814	8.02168e-06	3.06172
311.0207@3.051	8.22692e-06	6.29936
289.1646@4.4506	8.32158e-06	9.5958
346.1696@5.3255	8.32158e-06	7.12988
344.1538@5.8566	8.67876e-06	7.26312
223.0963@4.9139	8.67876e-06	3.73191
248.0623@2.1224	8.67876e-06	0.231981
345.1548@5.5507	9.28469e-06	3.27447
704.1987@1.5572	9.55179e-06	4.8427
431.1917@3.0152	1.05635e-05	3.183
438.0645@0.7013	1.05635e-05	3.99993
429.2107@4.8647	1.0579e-05	3.6069
361.153@4.2134	1.07664e-05	5.84473
218.996@1.9521	1.0933e-05	15.9072
521.2392@5.333	1.09431e-05	2.64041
676.3372@4.811	1.10231e-05	9.63415
350.1033@5.5371	1.17577e-05	3.58563
293.0182@3.2876	1.20754e-05	5.31028
173.0861@0.498	1.25586e-05	0.469867
430.7545@0.3022	1.25586e-05	0.253757
273.007@2.5015	1.27767e-05	2.98109
486.7145@0.2937	1.27767e-05	0.28084
162.0536@1.9404	1.29198e-05	9.8269
301.2007@5.1045	1.29469e-05	2.99169
606.0908@2.1716	1.31012e-05	3.10821
430.2064@3.946	1.31012e-05	5.57923
137.0601@1.6377	1.32145e-05	2.75713
481.2082@5.4378	1.32145e-05	4.84964
325.1077@0.8685	1.33288e-05	4.52275
303.1396@5.1573	1.34909e-05	3.07352
170.8992@0.2976	1.37355e-05	0.349515
347.0987@0.9086	1.37355e-05	5.34877
255.0864@3.4129	1.37742e-05	0.324498
135.0446@3.5384	1.40749e-05	6.9991
153.0185@1.0008	1.41481e-05	2.99332
121.0292@3.8493	1.48285e-05	3.22697
504.754@0.3046	1.48681e-05	0.29776
630.8767@0.259	1.5213e-05	0.462152
227.1275@3.4488	1.54761e-05	4.43703
431.0987@3.3934	1.6026e-05	5.61727
605.3102@5.3287	1.60394e-05	8.74591
189.0761@1.6282	1.61995e-05	0.411291
791.4204@4.8933	1.61995e-05	3.14212
545.0052@1.6482	1.64487e-05	3.78219
334.834@0.2958	1.74869e-05	0.440722
385.1805@4.572	1.76573e-05	3.9923
831.4045@5.2154	1.78837e-05	3.68355
526.7197@0.2924	1.82168e-05	0.433061
291.0902@4.0642	1.88188e-05	4.3516
420.0765@3.6314	1.89494e-05	7.04324
637.3205@5.3277	1.89859e-05	7.87856
272.02@1.4723	2.14178e-05	0.196568
291.0905@4.5421	2.14178e-05	10.5571
294.9533@0.2768	2.15066e-05	0.191098
144.0448@2.1207	2.21195e-05	0.380025
268.0644@3.3736	2.24151e-05	5.00792
371.098@2.1749	2.24656e-05	2.34094
429.213@3.4961	2.25925e-05	4.12025
343.0779@0.468	2.25925e-05	0.198849
187.1074@0.7967	2.31738e-05	2.62853
153.0185@1.2328	2.33775e-05	3.21998
355.0355@1.1088	2.33831e-05	0.269216
317.1956@5.0071	2.39921e-05	7.44786
328.7881@0.2935	2.5065e-05	0.265715
457.1826@3.0724	2.59629e-05	4.54456
336.155@3.3121	2.60705e-05	5.00989
128.9595@0.2763	2.7156e-05	0.300702
188.0344@2.1117	2.76847e-05	0.365956
383.0075@3.2768	2.77408e-05	0.195327
96.9602@2.4221	2.83312e-05	4.61612
247.0274@2.1639	2.98496e-05	5.90932
117.055@1.3579	2.99113e-05	0.368428
404.9162@0.2769	3.02918e-05	0.395049
399.1654@6.0087	3.05096e-05	3.28783
526.8268@0.3293	3.06082e-05	0.206679
350.8038@0.2961	3.11922e-05	0.432029
327.1082@2.7836	3.12924e-05	3.72729
409.08@2.1038	3.15466e-05	11.0638
557.1341@3.7504	3.18897e-05	7.97804
175.0233@1.5373	3.22149e-05	10.7187
366.0836@1.6419	3.25938e-05	0.323914
324.0024@4.0597	3.32282e-05	6.43319
548.7031@0.2913	3.35773e-05	0.313158
387.1916@5.0178	3.48975e-05	2.94694
427.0127@0.4562	3.54361e-05	0.227651
115.076@2.4865	3.58831e-05	0.381667
347.0231@5.2054	3.58831e-05	19.1107
360.1483@3.5217	3.61253e-05	3.8452
417.1189@4.4313	3.86065e-05	3.71996
239.1275@4.199	4.00624e-05	2.69659
380.1745@3.7108	4.07262e-05	9.97604
232.9754@0.9991	4.08528e-05	2.37981
213.1118@5.0408	4.106e-05	2.89762
279.0176@2.7886	4.14616e-05	6.96788
268.1548@4.5952	4.18258e-05	2.32903
282.9895@1.6791	4.18258e-05	0.371124
309.1006@3.6448	4.33799e-05	2.94389
583.3121@5.2675	4.33799e-05	8.97114
381.1003@4.5175	4.49624e-05	3.92071
395.1377@5.0087	4.75504e-05	0.37166
230.1132@0.7971	4.83796e-05	2.45082
440.8827@0.2744	4.83796e-05	0.257422
479.0509@0.5344	4.90488e-05	0.375761
373.1502@5.1882	5.00395e-05	2.43654
569.9991@1.9502	5.16576e-05	3.67559
657.1375@3.2838	5.16576e-05	0.17686
245.1182@5.2146	5.21625e-05	2.78996
247.0276@1.2996	5.40295e-05	2.44632
290.1245@1.5026	5.40295e-05	0.255588
640.1464@1.6762	5.41399e-05	6.03103
343.0924@4.8523	5.50727e-05	3.26982
431.1228@4.0477	5.55535e-05	17.0684
431.0985@3.7904	5.5633e-05	4.67624
275.094@4.9184	5.5633e-05	3.39918
541.0099@2.4913	5.75147e-05	3.12351
126.9073@0.352	5.77782e-05	0.380198
379.974@0.574	5.80082e-05	0.460073
261.134@1.8722	5.80082e-05	3.96128
308.0805@2.2621	5.89785e-05	0.441271
444.7234@0.2935	5.93059e-05	0.171978
564.6787@0.2917	6.06282e-05	0.316058
388.0638@1.6428	6.0726e-05	0.257826
92.9288@0.2924	6.09047e-05	0.275755
326.0537@0.736	6.10104e-05	3.13888
288.9876@0.4354	6.14759e-05	0.405207
181.0478@2.4893	6.17911e-05	0.440007
113.0238@5.9134	6.38651e-05	5.5198
203.0007@1.2303	6.59139e-05	4.15275
277.0202@5.0468	6.7757e-05	8.01096
336.8718@0.3306	6.94258e-05	0.301811
343.0658@1.2858	7.02321e-05	4.36256
837.2373@2.7698	7.16095e-05	0.298268
328.0665@1.684	7.55539e-05	0.340007
486.1619@3.4163	7.55539e-05	0.111159
423.0269@2.1049	7.55539e-05	0.375529
553.2296@4.3648	7.6151e-05	2.59368
464.7284@0.3	7.6151e-05	0.30452
403.0342@3.2791	7.62263e-05	0.242195
332.0441@1.8468	7.62593e-05	10.5749
377.1921@4.3462	8.08844e-05	5.12222
186.9296@0.2752	8.19513e-05	0.203785
270.1086@0.8823	8.19927e-05	2.08532
227.1025@1.8837	8.27027e-05	3.38579
415.1877@4.8356	8.30317e-05	7.21108
445.2095@4.9095	8.32293e-05	2.30389
271.1292@1.7891	8.32573e-05	2.30693
132.0449@2.0451	8.42179e-05	2.36404
189.0755@1.9258	8.539e-05	0.488198
159.0654@3.1225	8.83872e-05	3.92603
392.7784@0.2921	8.86975e-05	0.206086
135.0443@2.2649	9.06616e-05	5.70439
324.0916@0.3149	9.42653e-05	0.363219
448.7518@0.2986	9.63008e-05	0.25242
301.0559@1.2301	9.7887e-05	3.11708
215.1024@0.7155	9.97621e-05	2.21042
493.1553@2.8253	0.00010079	6.62751
394.774@0.2913	0.000103916	0.308618
377.0697@4.9317	0.000107977	4.99701
553.102@4.1842	0.000110518	13.0267
406.2023@5.0085	0.000113224	4.19995
195.1125@4.2478	0.000113224	4.81781
570.7853@0.3128	0.000116991	0.243692
109.029@1.384	0.000117681	2.36583
450.797@0.364	0.000117792	0.126763
360.149@4.9955	0.000118174	3.797
291.0189@2.3701	0.00012024	8.29596
337.0381@3.5299	0.000124884	3.75694
681.9875@2.0549	0.000124884	6.04374
253.0776@0.8875	0.000125299	3.02313
455.1538@4.6013	0.000126886	0.443764
240.1234@4.0897	0.000127924	3.90338
155.1066@4.8182	0.000130278	3.59414
121.0291@2.718	0.000130306	6.34618
263.005@1.9407	0.000130425	8.48551
473.1453@4.8073	0.000130891	5.52012
357.0827@1.5404	0.000132364	2.15237
307.1389@3.3209	0.000132497	2.66609
243.9919@0.6505	0.000135092	0.184546
281.0998@3.3208	0.000138563	0.452027
703.3679@4.8456	0.000138669	3.2622
537.2329@3.7849	0.000139656	3.53894
188.9856@1.3926	0.000141793	2.33761
214.1074@4.2712	0.000143835	3.1674
155.0964@5.4788	0.000144073	4.09352
601.3227@4.9984	0.00014627	8.76272
258.9914@1.9397	0.000146565	2.38116
295.1304@4.3207	0.000147856	4.23886
270.0073@2.7246	0.000148582	4.67752
304.0141@1.4571	0.000150452	4.87026
162.0547@2.386	0.000150857	3.11633
435.1414@3.4058	0.000154991	2.239
245.0427@4.7244	0.000161248	0.334767
154.0616@0.2765	0.000161713	0.101476
401.1089@1.5223	0.000166215	2.63468
389.1797@2.6877	0.000166986	3.5048
363.1749@4.8797	0.000166986	0.111864
459.0938@3.3295	0.000168114	6.63808
393.2632@5.3346	0.000171103	4.47482
363.0177@4.2249	0.000171916	6.17459
242.9399@0.2749	0.000173001	0.276968
154.9215@0.2946	0.000173626	0.34428
271.9901@0.3827	0.00017547	6.45109
219.0266@3.4003	0.00018261	0.458527
171.0643@1.9189	0.000184593	0.436994
375.1981@5.0014	0.000184666	3.71428
245.0124@2.023	0.000184921	4.46135
99.045@0.915	0.000186801	4.38853
406.7805@0.2899	0.000191042	0.260813
229.0168@3.9959	0.000192199	3.42398
329.1592@5.3426	0.000194469	9.80576
439.101@4.4498	0.000196257	3.324
237.1233@4.249	0.000197166	3.74253
261.1121@4.6627	0.000198122	3.62127
301.0865@0.9169	0.000203789	9.51361
150.0548@2.2261	0.000204213	2.83598
185.0714@4.6792	0.000204213	0.454052
215.9962@1.2597	0.000209647	3.88618
231.1227@4.2256	0.000210334	0.185073
423.0977@2.7631	0.000211453	0.428376
74.0251@5.1146	0.0002188	3.99918
231.9917@1.7055	0.000221028	0.29265
358.0784@0.7121	0.000222104	4.18077
491.1541@5.2179	0.000223172	4.06042
250.8359@0.2937	0.00022388	0.196503
176.0709@2.5286	0.00022388	2.79012
326.0873@2.2176	0.000226257	2.64077
508.7105@0.2948	0.000226816	0.245069
239.1272@4.4345	0.000228599	3.4131
387.202@4.2504	0.000236221	5.41309
220.0607@2.529	0.000244694	2.74908
261.0741@5.0399	0.000244819	0.23296
268.0269@1.5425	0.000244864	2.9001
274.0388@1.7698	0.000246185	2.56962
302.1342@1.8524	0.000247916	3.29709
279.1341@4.5956	0.000248507	3.42991
210.0433@0.4156	0.000254028	0.417515
353.0336@4.9918	0.000254583	14.5078
593.1887@4.4104	0.000264346	4.91558
204.9804@0.6747	0.000264675	2.65316
638.6145@0.2931	0.000266288	0.196473
534.9989@2.5291	0.000280902	0.261391
283.1401@1.0959	0.000281252	5.6741
434.851@0.3262	0.000281524	0.32759
495.1195@3.2559	0.000282706	2.67807
393.0643@4.8342	0.000283818	7.40796
446.1784@5.2841	0.00028968	0.307603
610.1348@1.6834	0.000291055	3.51778
259.129@1.3977	0.00029184	2.14998
103.0549@4.0476	0.000292381	3.17907
301.1321@4.8171	0.000293369	2.19889
513.1703@4.5816	0.000293369	0.387662
183.0269@0.6377	0.000293373	0.38492
541.2272@1.1985	0.000299925	3.02666
395.0803@3.6941	0.000303686	3.99514
378.159@4.6366	0.000306791	4.08209
343.07@1.743	0.000310181	6.03306
640.6822@0.3003	0.00031301	0.316581
282.1331@4.648	0.000322917	3.28712
622.642@0.293	0.00032706	0.252073
303.0861@4.0034	0.00032706	4.49528
206.0448@2.3872	0.000328254	2.98676
161.0988@5.1774	0.000332922	2.18391
453.0809@3.7902	0.00033444	4.59017
117.0706@4.0551	0.000344371	3.1144
123.0448@2.6077	0.000344553	3.86815
216.9138@0.3455	0.000344553	0.249409
305.0329@1.8239	0.000355142	3.89885
624.7044@0.298	0.00035515	0.405461
236.8621@0.2992	0.000356389	0.288367
505.1276@3.0145	0.000359156	6.37192
532.8699@0.2683	0.000359156	0.35056
325.0922@3.2941	0.000361399	5.04652
407.0654@2.1879	0.000365049	15.4888
189.1275@4.35	0.000368304	2.97525
299.1122@3.5237	0.000369258	0.293978
160.0394@1.5162	0.000370811	5.0249
374.8193@0.2903	0.000380589	0.350503
269.1357@4.4415	0.000386235	0.252149
355.0982@4.3177	0.000398623	6.09676
363.0179@5.0189	0.000408808	15.0622
435.1407@1.5906	0.000411581	2.61473
485.9775@1.711	0.00042046	0.284236
167.034@1.5828	0.00042228	2.06151
300.911@0.2764	0.000423362	0.370924
407.207@3.7408	0.000434526	3.17547
283.0616@4.217	0.000438346	5.94072
401.1559@2.9117	0.000449762	2.68915
115.0398@2.1647	0.000452304	2.00391
413.1473@5.5234	0.000452304	2.3426
408.9338@0.2766	0.000456877	0.294949
317.0521@1.2414	0.000471351	3.95491
189.0758@3.2089	0.000471429	3.99709
208.9886@1.7478	0.000489936	0.39284
305.1598@5.319	0.000489936	2.07793
295.1292@3.4947	0.000491772	3.04702
765.372@4.5985	0.000491791	3.04449
294.8258@0.3022	0.000499628	0.318216
281.1139@4.0031	0.00050192	2.61363
375.1651@3.7957	0.000504442	2.25712
419.1588@5.2842	0.000508776	0.334212
402.7197@0.2984	0.000515632	0.176541
316.8408@0.2929	0.000517462	0.319255
423.2029@3.1983	0.000519954	2.61424
435.9593@0.442	0.000520157	0.404694
225.1118@3.2117	0.000526491	2.30395
232.9905@1.2377	0.000530482	2.65514
206.0819@3.2729	0.000535464	2.86085
254.0698@0.6408	0.000539096	0.257693
287.127@2.7633	0.000540467	2.01994
246.0966@2.003	0.000541109	0.428033
79.9577@1.6355	0.000579516	2.68821
273.0791@4.5228	0.000579737	4.3495
236.0763@0.5307	0.000584336	2.58438
258.0413@2.0943	0.000589883	5.10093
249.0066@1.4434	0.000601236	3.23989
369.0828@2.1182	0.000605805	2.36454
254.1138@1.8551	0.000619451	2.79856
387.1646@3.2512	0.0006251	2.5231
271.1298@1.5322	0.000628976	2.37737
124.0399@3.2128	0.000630889	3.54827
406.0674@0.3271	0.000639043	0.478247
130.0657@4.0455	0.000642435	2.82593
312.8128@0.2935	0.000648031	0.368606
161.0449@0.314	0.000650907	0.3836
700.6023@0.2931	0.00066156	0.322801
483.1767@4.7591	0.000663155	5.7522
214.891@0.2936	0.000663214	0.470161
455.0713@2.805	0.000672521	3.87423
477.1776@4.3245	0.000675936	4.44942
459.0944@5.0593	0.000678468	7.47645
59.0151@2.0092	0.00068091	0.435615
71.0508@0.8357	0.000687248	2.94469
230.1379@3.2172	0.000701966	2.82841
378.9164@0.2771	0.000721113	0.239321
224.0921@3.2141	0.000728177	3.47299
103.0393@0.5967	0.000739576	0.30946
239.0922@5.042	0.000743026	0.382358
651.1237@3.2911	0.000746509	0.262325
392.1809@3.3103	0.000749303	0.0705027
437.0759@2.1418	0.000754937	8.13956
181.0861@3.4469	0.000781914	2.64086
238.9987@1.9661	0.000790545	0.455524
242.9966@2.6802	0.000796577	5.63332
410.022@2.3102	0.000802159	3.2267
386.7471@0.3011	0.000812929	0.23628
273.0071@2.8014	0.000815202	3.03347
315.0715@1.3196	0.000833849	3.78668
495.9995@2.147	0.00083808	13.1324
336.0719@0.9178	0.000849332	4.22791
586.6717@0.2927	0.000854794	0.269665
497.0707@3.1964	0.000867386	3.0498
216.0932@0.4909	0.00088342	0.44169
225.1411@5.3434	0.000887687	2.77866
391.2479@5.623	0.000887687	4.5496
162.0222@3.5234	0.000912826	2.32201
287.1236@1.523	0.000915563	2.72581
320.15@4.8747	0.000919886	5.56633
184.0969@3.2377	0.000923232	2.13599
160.0761@4.0528	0.000925214	2.57076
212.0016@2.5203	0.000944409	2.18278
784.3504@1.3267	0.000954754	0.322711
204.9803@1.1	0.000971782	6.20323
263.1271@4.653	0.000993035	2.81375
330.075@3.2567	0.0010091	2.34282
741.1263@1.7212	0.00101569	4.24825
400.1791@5.5798	0.00102778	2.62296
196.0601@1.3918	0.00103265	2.02624
237.1223@4.003	0.0010507	2.6493
253.05@4.8216	0.00105303	3.25092
146.0444@0.3283	0.00107369	0.495286
366.1192@3.21	0.00107636	2.38716
319.0663@0.7163	0.00108247	3.7705
263.0226@2.8456	0.00109497	2.7772
239.9966@1.5198	0.00109497	3.23428
293.0448@1.1405	0.00110909	0.315351
204.0657@4.0575	0.00111713	2.48213
242.0122@1.5705	0.00111975	3.75112
397.1392@3.884	0.00114695	3.0966
353.1525@3.5095	0.00117839	3.03706
217.1069@3.8224	0.00118055	2.51068
227.1014@1.6515	0.00121243	0.403963
267.0919@4.7297	0.00122932	2.34896
271.1554@4.8634	0.00122942	2.93487
203.0816@1.8421	0.00123893	0.197339
485.1239@3.23	0.0012445	4.72157
319.1385@5.3185	0.00125818	2.22001
279.1586@5.3636	0.00125892	2.08772
266.1393@5.7501	0.00129645	7.19781
802.4108@4.8931	0.00129863	2.88255
245.0924@4.0341	0.00131873	5.7368
356.8197@0.2914	0.00132257	0.438023
175.0238@5.9281	0.00134046	5.68076
143.0706@1.9959	0.0013842	0.428848
399.0601@2.1147	0.00140589	0.147233
459.2257@5.4214	0.00142057	2.6217
436.1436@3.4114	0.00142754	2.11796
371.0983@2.5401	0.00143234	3.52785
372.0936@2.2118	0.00143234	2.01049
240.1231@4.6277	0.00148228	2.15448
589.1541@3.2725	0.0014954	0.398816
662.6535@0.2938	0.00150432	0.479358
249.0971@2.0557	0.00152937	0.3227
177.0759@0.9493	0.00155103	0.485597
349.2012@3.5137	0.00158029	0.462068
346.0542@2.2676	0.00159248	0.295272
215.0318@0.2931	0.00159409	0.423429
605.1282@3.2764	0.00161995	0.338955
446.8388@0.2763	0.00162304	0.341105
417.2107@4.6036	0.00169316	2.43564
427.9746@1.6769	0.0017045	0.277842
360.1133@1.908	0.00170865	0.368813
542.6971@0.2952	0.00172111	0.355082
74.0251@4.0121	0.00172111	2.52484
525.0926@1.1282	0.00173912	0.258388
243.0803@4.0812	0.00179299	2.30211
252.0866@2.5733	0.00179425	2.15134
238.9692@1.4738	0.00180065	10.1928
580.6547@0.2921	0.00181278	0.250199
273.0619@2.7318	0.00185101	0.371495
589.3367@6.4073	0.00185434	2.40307
297.0614@2.7101	0.00185921	4.2494
152.0295@1.6729	0.00187158	0.262524
176.0175@2.6565	0.00188665	7.34859
297.0967@3.5134	0.00189791	2.0734
295.1002@1.2042	0.00192049	2.18179
377.0855@0.3084	0.00192608	0.355634
147.0649@1.0023	0.00193008	2.57025
95.0135@3.2701	0.00193707	0.497117
305.0694@2.7457	0.00201775	2.46085
241.1074@3.4493	0.00205842	2.1837
375.181@4.2742	0.00208002	2.69058
205.0108@2.4055	0.00211715	0.418906
158.9251@0.3354	0.00212994	0.475565
415.1575@3.1046	0.00214023	3.08031
239.0896@3.5094	0.00214726	0.367154
325.9976@0.3453	0.00217989	0.243356
288.8234@0.2993	0.00220898	0.428135
113.0241@4.1699	0.00221386	4.23031
234.0072@0.6419	0.00221386	2.62888
486.9814@1.6644	0.0022309	0.129043
468.1035@0.4204	0.00223928	0.339467
249.0061@1.0867	0.00224351	2.80849
480.0041@2.513	0.00226078	4.38467
301.0685@4.8489	0.00229682	5.30103
162.0546@2.7118	0.00229698	6.97353
363.0691@2.4122	0.00230354	0.186552
179.035@0.8414	0.00232793	0.140549
324.9702@2.458	0.00237882	3.7925
299.0773@3.0698	0.00238281	2.80565
621.3281@4.9492	0.00241029	2.28311
842.8617@0.2595	0.00241272	2.25009
434.7603@0.2915	0.00241857	0.248028
295.0819@3.9034	0.00246385	3.28166
600.6488@0.2968	0.00247958	0.265667
220.8916@0.2841	0.00248134	0.351118
101.0241@0.6173	0.00250242	0.407184
362.9404@0.2754	0.00253611	0.182155
129.0188@1.1085	0.00256757	0.289566
345.0421@1.9889	0.00257834	0.323463
295.1016@0.6491	0.0026061	2.16709
337.0683@0.8996	0.00261266	2.68989
447.0939@3.9481	0.00266216	4.90673
112.9849@0.2767	0.00271142	0.348906
309.1006@5.1728	0.00277461	2.34108
413.1482@4.4036	0.00278417	2.9288
205.0376@0.6282	0.00278569	2.45371
219.1375@4.6474	0.00278774	3.18134
405.2497@3.5194	0.00278914	0.218799
491.0326@2.4522	0.00281344	3.87597
169.1213@5.0804	0.00281375	2.3486
275.0227@2.4445	0.00281807	3.46936
347.1711@5.9146	0.00282091	3.51054
253.9734@1.6919	0.00284599	0.255978
332.1175@4.0008	0.00287786	2.10463
305.0329@2.3987	0.00289789	4.38076
459.2458@3.1983	0.00291519	2.36596
450.088@1.6324	0.00296997	0.44192
760.6428@0.2999	0.00296997	0.323664
506.9665@1.7514	0.00301652	0.462002
103.0034@3.2816	0.00302683	0.49789
217.1073@3.0154	0.0030278	3.61001
131.0816@0.2968	0.00311475	0.304351
390.9063@0.3165	0.00316351	0.425958
491.1245@2.6274	0.00317851	3.41782
717.1175@2.6051	0.00318688	0.213004
620.0827@3.2753	0.00319748	0.351533
283.1206@3.045	0.00322434	2.01824
418.8942@0.2586	0.00322522	0.397321
242.0116@2.7262	0.00322522	5.49194
407.2799@5.6241	0.00327551	26.6578
722.6005@0.2925	0.00328271	0.319914
363.1653@4.2802	0.00330397	2.74693
493.1545@1.1045	0.00332901	0.308004
195.0655@2.45	0.00335502	7.50757
831.2196@2.7666	0.00335819	0.403484
75.0091@1.1311	0.00337709	0.35937
243.0331@4.7144	0.00340112	2.4648
240.0845@1.4681	0.00341185	0.469618
347.1334@3.1924	0.0034387	0.406783
155.1068@3.5072	0.00345886	0.337005
157.086@3.5146	0.00348741	0.338316
414.1613@0.6715	0.00348741	2.55599
217.0708@1.1091	0.00352576	0.356712
594.9959@1.9471	0.00360603	3.52651
129.0551@1.8787	0.00362313	2.58505
274.1417@0.3075	0.00362494	0.378458
175.0239@4.1721	0.00369722	3.48597
254.9186@0.2763	0.00369722	0.192309
277.0239@1.5321	0.00369853	2.55881
479.1139@2.3941	0.0037122	0.441241
401.1108@2.7004	0.0037125	3.33903
200.0556@0.5893	0.0037125	3.52366
260.8757@0.2792	0.0037125	0.319958
281.1124@2.96	0.00375717	2.28586
200.128@5.2927	0.00377243	3.98647
285.0612@0.9996	0.003791	2.84359
103.0034@2.189	0.00391498	2.77526
199.096@3.5069	0.00397807	0.306779
607.3492@5.8682	0.00403013	2.43315
285.1361@4.8633	0.00412326	2.12805
217.1071@3.5121	0.00414508	0.360572
395.0759@3.3091	0.0041724	0.361572
631.1823@2.9851	0.00418046	3.13455
121.0575@2.4593	0.00424247	2.80572
157.0135@3.2749	0.00425712	0.495529
182.0816@3.0938	0.00430151	2.00331
677.1855@2.9502	0.00430272	13.8482
259.1303@1.9539	0.00432334	0.356014
289.0868@1.266	0.00437762	2.11396
216.1227@2.8965	0.004427	3.35072
342.2388@4.0552	0.00444684	0.170321
342.0828@1.9579	0.00450808	2.05052
420.0252@2.6042	0.00450808	0.284939
117.019@0.3336	0.00455175	2.12234
423.9812@0.3386	0.00457999	0.40106
506.7431@0.2851	0.00463092	0.249787
495.1692@5.0242	0.00466202	0.219298
506.1262@5.284	0.00466202	0.488081
176.8994@0.3013	0.00474944	0.215862
85.0295@1.1092	0.00478654	0.364444
370.0776@1.9138	0.00487476	0.486856
569.0044@2.4874	0.00490178	4.0159
176.9351@0.3144	0.00493058	0.49894
107.0498@1.8642	0.00493492	2.67985
523.2562@5.2947	0.00504768	0.205298
627.3744@4.9619	0.00508341	0.233925
292.9127@0.3404	0.00508341	0.470468
254.1026@2.8942	0.00516834	0.45087
324.1558@4.3031	0.00519598	2.18088
142.0656@4.0839	0.00524547	2.2679
266.0715@1.4506	0.00526912	5.11371
215.0009@2.3793	0.00529727	4.44724
739.9674@1.727	0.00530724	0.372788
71.0148@1.1293	0.00531158	0.325991
571.0202@2.4675	0.00531694	5.90527
221.0813@5.1082	0.00533585	2.20737
245.012@2.47	0.00534796	2.50568
451.0554@2.1654	0.00541055	4.07113
112.016@1.1008	0.00543373	0.296737
303.0536@3.7323	0.00553067	0.495255
427.233@3.5824	0.00553067	0.267153
777.3846@4.569	0.0056244	2.31434
463.0009@1.699	0.00562473	2.2414
678.6192@0.2934	0.00570727	0.374766
332.8138@0.293	0.00571397	0.479186
227.0565@2.7279	0.00573706	0.385541
751.2278@1.1148	0.00581517	0.172293
161.0445@0.9087	0.00584106	3.77372
531.2056@0.4635	0.00602146	2.31477
358.0549@2.6022	0.0061708	0.404534
437.0388@1.4842	0.00624035	3.21067
235.0816@1.1355	0.00628911	0.362931
509.1193@2.2992	0.00635689	0.394098
341.088@2.7668	0.00636299	2.72168
341.1599@4.7311	0.00638079	2.24998
102.9576@0.2867	0.00645004	0.340083
100.0038@4.0881	0.00661023	2.12462
267.1408@4.6211	0.00666281	3.43511
699.1669@2.9498	0.00667307	7.16039
149.06@3.9997	0.00679451	3.22645
221.0788@3.5077	0.00680439	0.322195
341.088@2.4087	0.00680785	0.40454
580.1324@2.3274	0.00690099	0.434998
212.1277@5.163	0.00697868	3.47046
175.0242@4.6569	0.00705642	0.258682
431.1918@3.9864	0.00706837	0.346751
356.0985@2.4313	0.00706837	2.73694
387.1613@2.953	0.00723491	3.36016
246.1434@5.385	0.00729837	2.14037
250.0414@0.6605	0.00734861	2.71546
521.0143@0.3525	0.00738912	0.470032
386.9998@1.311	0.00741372	0.415852
346.1616@1.3823	0.00753273	2.56361
455.1897@4.2465	0.00759572	3.85045
325.0526@1.6171	0.00778153	0.472282
241.1103@4.4098	0.0077857	0.326503
673.1539@2.6052	0.0077966	2.93742
326.9028@0.2764	0.0078243	0.368202
335.0443@1.7994	0.00783177	3.69945
469.0765@3.9457	0.0080394	5.57473
293.1751@6.0927	0.00813764	0.248447
165.055@2.4676	0.00824999	2.29438
329.0855@1.283	0.00859331	2.38109
276.126@3.4911	0.00865203	0.396991
734.8777@4.4067	0.00866857	3.76245
449.1089@4.7989	0.00869671	4.72076
421.044@2.1735	0.00878458	5.13371
540.2443@0.9026	0.00879924	2.65218
375.133@3.9541	0.00883141	2.34045
354.1219@1.7443	0.00883233	2.3212
287.0226@2.7035	0.00889677	6.55266
336.0734@1.8461	0.00892435	2.28173
325.0926@4.1909	0.00910634	2.43968
381.1781@1.3509	0.00911873	3.87163
201.022@4.3249	0.00930964	3.70617
74.0253@0.4685	0.00954397	0.400073
759.2825@0.5897	0.00956643	2.2788
543.0253@2.464	0.00980637	2.27697
401.1468@4.5822	0.0100196	0.330755
781.1704@2.3333	0.0100319	0.273
245.0943@3.6761	0.0100864	2.92451
402.17@4.8817	0.0100864	2.17984
121.0655@4.3092	0.0100961	6.81571
373.0769@1.9719	0.010171	2.36354
227.0664@0.6251	0.010314	0.344106
606.6708@0.2927	0.0103287	0.354059
379.0337@2.1895	0.0104671	0.354847
108.0383@1.6587	0.0106583	0.21523
290.179@4.7868	0.0106583	2.65674
274.002@1.2408	0.0107047	2.36364
461.2395@5.1199	0.0107388	2.31596
329.102@4.6261	0.0108113	2.79432
280.1297@2.3866	0.0108113	2.34871
113.0241@1.1415	0.0108951	0.475884
157.0143@1.1071	0.0110113	0.38714
267.1224@4.4221	0.011129	0.416383
492.7382@0.2949	0.0111565	0.364148
755.4019@4.5765	0.0112254	2.14478
359.1856@5.1606	0.0112321	0.267025
269.1004@3.2737	0.011263	0.378019
456.9896@1.6505	0.011263	2.4185
301.1653@3.8669	0.0112647	5.80413
271.061@5.139	0.0115617	4.36722
521.2392@5.1141	0.0117905	0.365921
239.9968@2.4684	0.0118578	2.27766
259.0982@4.7269	0.0118968	2.53891
266.0668@3.5128	0.0120634	2.1491
589.3389@5.9101	0.0123038	2.13997
344.1459@1.3495	0.0123693	2.37877
160.8429@2.5136	0.0123704	0.376912
128.0346@2.0257	0.0124032	0.380209
57.0361@1.1008	0.012529	0.306374
99.0087@2.1904	0.0126118	2.25163
447.2004@4.8761	0.0128265	0.209102
165.0552@2.812	0.0131048	2.46002
350.1074@0.4727	0.0131739	0.447106
396.1338@2.5465	0.0134224	2.12592
117.0189@1.1146	0.0134912	0.361304
271.1542@5.1084	0.0135662	2.68519
293.0151@2.2079	0.013636	3.12545
295.1338@1.6594	0.0138186	2.34425
304.9975@0.8061	0.0140696	0.25899
334.1375@1.8753	0.0140867	2.10865
271.0597@6.6798	0.0142503	0.284109
456.8312@0.3179	0.0143756	0.346426
512.1178@2.7318	0.0143896	2.24062
259.1183@2.85	0.0145628	0.476092
162.055@2.9638	0.0146338	3.04505
263.1478@3.9724	0.014894	2.99276
